# Supplementary material for: MnFe2O4@NH2@2AB-Ni: a novel, highly active, stable and magnetically recoverable nanocatalyst and use of this heterogeneous catalyst in green synthesis of spirooxindoles in water
Source: Royal Society of Chemistry journal article supplement (doi:10.1039/c4nj01182a), 2014-09-17
Supplement: c4nj01182a1.pdf [file c4nj01182a1.pdf]

**MnFe<sub>2</sub>O<sub>4</sub>@NH<sub>2</sub>@2AB-Ni: A novel, highly active, stable and magnetically recoverable nanocatalyst and use of this heterogeneous catalyst in green synthesis of spirooxindoles in water**

H. Naeimi,<sup>a</sup> Z. Rashid,<sup>a</sup> A.-H. Zarnani,<sup>b</sup> and R. Ghahremanzadeh<sup>\*c</sup>

<sup>a</sup>Department of Organic Chemistry, Faculty of Chemistry, University of Kashan, Kashan, 87317, I.R. Iran.

<sup>b</sup>Reproductive Immunology Research Center, Avicenna Research Institute, (ACECR), Tehran, Iran.

<sup>c</sup>Nanobiotechnology Research Center, Avicenna Research Institute, (ACECR), Tehran, Iran.

E-mail: [r.ghahremanzadeh@avicenna.ac.ir](mailto:r.ghahremanzadeh@avicenna.ac.ir)

**SUPPORTING INFORMATION**

| <i>List of contents</i>                   | <i>Page</i> | <i>List of contents</i>          | <i>Page</i> |
|-------------------------------------------|-------------|----------------------------------|-------------|
| Title, author's name, address             | <b>1</b>    | <sup>13</sup> C NMR of <b>8a</b> | <b>23</b>   |
| General methods and characterization data | <b>2-9</b>  | <sup>1</sup> H NMR of <b>8b</b>  | <b>24</b>   |
| <sup>1</sup> H NMR of <b>4a</b>           | <b>10</b>   | <sup>13</sup> C NMR of <b>8b</b> | <b>25</b>   |
| <sup>13</sup> C NMR of <b>4a</b>          | <b>11</b>   | <sup>1</sup> H NMR of <b>8c</b>  | <b>26</b>   |
| <sup>1</sup> H NMR of <b>4b</b>           | <b>12</b>   | <sup>13</sup> C NMR of <b>8c</b> | <b>27</b>   |
| <sup>13</sup> C NMR of <b>4b</b>          | <b>13</b>   | <sup>1</sup> H NMR of <b>8d</b>  | <b>28</b>   |
| <sup>1</sup> H NMR of <b>4c</b>           | <b>14</b>   | <sup>13</sup> C NMR of <b>8d</b> | <b>29</b>   |
| <sup>13</sup> C NMR of <b>4c</b>          | <b>15</b>   | <sup>1</sup> H NMR of <b>8e</b>  | <b>30</b>   |
| <sup>1</sup> H NMR of <b>4d</b>           | <b>16</b>   | <sup>13</sup> C NMR of <b>8e</b> | <b>31</b>   |
| <sup>13</sup> C NMR of <b>4d</b>          | <b>17</b>   | <sup>1</sup> H NMR of <b>8f</b>  | <b>32</b>   |
| <sup>1</sup> H NMR of <b>4e</b>           | <b>18</b>   | <sup>13</sup> C NMR of <b>8f</b> | <b>33</b>   |
| <sup>13</sup> C NMR of <b>4e</b>          | <b>19</b>   | <sup>1</sup> H NMR of <b>8g</b>  | <b>34</b>   |
| <sup>1</sup> H NMR of <b>4f</b>           | <b>20</b>   | <sup>13</sup> C NMR of <b>8g</b> | <b>35</b>   |
| <sup>13</sup> C NMR of <b>4f</b>          | <b>21</b>   | <sup>1</sup> H NMR of <b>8h</b>  | <b>36</b>   |
| <sup>1</sup> H NMR of <b>8a</b>           | <b>22</b>   | <sup>13</sup> C NMR of <b>8h</b> | <b>37</b>   |

## Experimental Part

**General.** The chemicals used in this work were obtained from Fluka and Merck and were used without purification. Melting points were measured on an Electrothermal 9200 apparatus. IR spectra were recorded as KBr pellets on a Perkin-Elmer 781 spectrophotometer and an Impact 400 Nicolet FT-IR spectrophotometer.  $^1\text{H}$  and  $^{13}\text{C}$  NMR spectra were recorded on a BRUKER DRX-300 AVANCE spectrometer at 300.13 and 75.47 MHz.  $^1\text{H}$  and  $^{13}\text{C}$  NMR spectra were obtained on solutions in  $\text{DMSO-}d_6$  using tetramethylsilane as internal reference. X-ray diffraction (XRD) pattern of the as-synthesized material was obtained using a Holland Philips Xpert X-ray powder diffraction (XRD) diffractometer (CuK $\alpha$  radiation,  $\lambda = 0.154056$  nm), at a scanning speed of  $2^\circ/\text{min}$  from  $10^\circ$  to  $100^\circ$  ( $2\theta$ ). The nanocatalyst was determined using a KYKY EM-3200 Scanning Electron Microscope (SEM) operated at a 26 kV accelerating voltage. Thermogravimetric/differential thermal analyses (TG/DTA) was performed on a Thermal Analyzer with a heating rate of  $20^\circ\text{C min}^{-1}$  over a temperature range of  $25\text{--}800^\circ\text{C}$  under flowing compressed  $\text{N}_2$ . The content of nickel in the heterogenized catalyst was determined by VISTA-PRO, CCD simultaneous ICP analyser. The purity determination of the substrates and reaction monitoring were accomplished by TLC on silica-gel polygram SILG/UV 254 plates (from Merck Company).

### Typical procedure for the preparation of spirooxindoles 4(a-f) and 8(a-h).

A mixture of isatin **1** (1 mmol), cyclohexane-1,3-dione **2** (1 mmol), 2,6-diaminopyrimidin-4(3*H*)-one **3** or barbituric acid **7** (1 mmol), catalyst (10 mg) and water (5 mL) was added in a round-bottomed flask and stirred at  $90^\circ\text{C}$ . After completion of the reaction (monitored by TLC) the catalyst was easily separated from the reaction mixture with an external magnet. After separation of catalyst, the reaction mixture was filtered and the precipitate washed with water and recrystallized by EtOH to afford the pure product.

**2'-Amino-1-methyl-8',9'-dihydro-3'*H*-spiro[indoline-3,5'-pyrimido[4,5-*b*]quinoline]-2,4',6'(7'*H*,10'*H*)-trione (4a).**

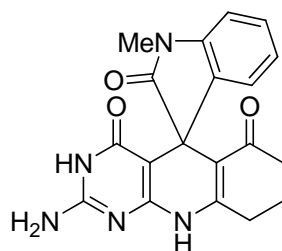

Cream powder (79%); mp >300 °C dec. IR (KBr) ( $\nu_{\max}/\text{cm}^{-1}$ ): 3438, 3288, 2933, 1677, 1652.  $^1\text{H}$  NMR (300 MHz, DMSO- $d_6$ ):  $\delta_H$  (ppm) 1.79 (2H, brs, CH<sub>2</sub>), 2.03 (2H, brs, CH<sub>2</sub>), 2.52 (2H, brs, CH<sub>2</sub>), 3.04 (3H, s, NCH<sub>3</sub>), 6.40 (2H, s, NH<sub>2</sub>), 6.75-7.07 (4H, m, H-Ar), 9.55 (1H, s, NH), 10.12 (1H, s, NH).  $^{13}\text{C}$  NMR (75 MHz, DMSO- $d_6$ ):  $\delta_C$  (ppm) 21.2, 26.6, 27.3, 37.5, 48.4, 91.8, 106.8, 110.5, 121.4, 122.7, 127.3, 136.6, 145.1, 153.8, 154.4, 154.6, 160.4, 179.5, 193.4.

**2'-Amino-1-methyl-5-nitro-8',9'-dihydro-3'H-spiro[indoline-3,5'-pyrimido[4,5-b]quinoline]-2,4',6'(7'H,10'H)-trione (4b).**

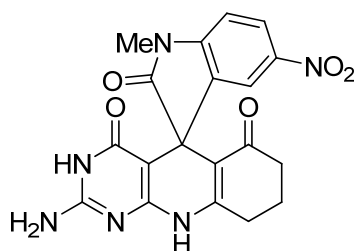

Cream powder (80%); mp >300 °C dec. IR (KBr) ( $\nu_{\max}/\text{cm}^{-1}$ ): 3299, 3167, 2944, 1688, 1669.  $^1\text{H}$  NMR (300 MHz, DMSO- $d_6$ ):  $\delta_H$  (ppm) 1.81-1.82 (2H, m, CH<sub>2</sub>), 2.07-2.11 (2H, m, CH<sub>2</sub>), 2.55-2.59 (2H, m, CH<sub>2</sub>), 3.16 (3H, s, NCH<sub>3</sub>), 6.53 (2H, s, NH<sub>2</sub>), 7.02-8.17 (3H, m, H-Ar), 9.80 (1H, s, NH), 10.28 (1H, s, NH).  $^{13}\text{C}$  NMR (75 MHz, DMSO- $d_6$ ):  $\delta_C$  (ppm) 21.0, 26.9, 27.2, 37.2, 48.5, 90.8, 106.8, 109.4, 117.8, 125.2, 137.5, 142.3, 151.4, 154.1, 154.9, 155.7, 160.6, 180.3, 193.9.

**2'-Amino-8',8'-dimethyl-8',9'-dihydro-3'H-spiro[indoline-3,5'-pyrimido[4,5-b]quinoline]-2,4',6'(7'H,10'H)-trione (4c).**

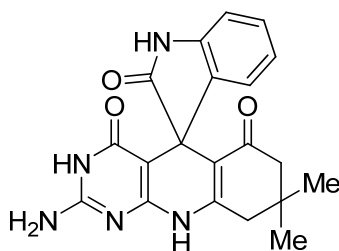

Cream powder (96%); mp >300 °C dec. IR (KBr) ( $\nu_{\max}$ /  $\text{cm}^{-1}$ ): 3334, 3189, 2938, 1697, 1655.  $^1\text{H}$  NMR (300 MHz,  $\text{DMSO-}d_6$ ):  $\delta_H$  (ppm) 0.90 (3H, s,  $\text{CH}_3$ ), 0.98 (3H, s,  $\text{CH}_3$ ), 1.82-2.08 (2H, m,  $\text{CH}_2$ ), 2.32-2.50 (2H, m,  $\text{CH}_2$ ), 6.35 (2H, s,  $\text{NH}_2$ ), 6.57-6.99 (4H, m, H-Ar), 9.45 (1H, s, NH), 9.92 (1H, s, NH), 10.24 (1H, s, NH).  $^{13}\text{C}$  NMR (75 MHz,  $\text{DMSO-}d_6$ ):  $\delta_C$  (ppm) 26.9, 28.9, 32.3, 48.8, 51.0, 92.1, 108.1, 109.3, 120.6, 122.8, 127.0, 137.3, 143.6, 152.2, 153.9, 154.5, 160.5, 180.7, 193.1.

**2'-Amino-5-bromo-8',8'-dimethyl-8',9'-dihydro-3'H-spiro[indoline-3,5'-pyrimido[4,5-*b*]quinoline]-2,4',6'(7'H,10'H)-trione (4d).**

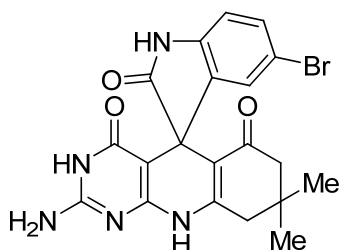

Cream powder (94%); mp >300 °C dec. IR (KBr) ( $\nu_{\max}$ /  $\text{cm}^{-1}$ ): 3416, 3164, 2959, 1701, 1645.  $^1\text{H}$  NMR (300 MHz,  $\text{DMSO-}d_6$ ):  $\delta_H$  (ppm) 0.91 (3H, s,  $\text{CH}_3$ ), 0.97 (3H, s,  $\text{CH}_3$ ), 1.88-2.06 (2H, m,  $\text{CH}_2$ ), 2.41 (2H, brs,  $\text{CH}_2$ ), 6.42 (2H, s,  $\text{NCH}_2$ ), 6.54-7.15 (3H, m, H-Ar), 9.55 (1H, s, NH), 10.12 (1H, s, NH), 10.31 (1H, s, NH).  $^{13}\text{C}$  NMR (75 MHz,  $\text{DMSO-}d_6$ ):  $\delta_C$  (ppm) 27.3, 28.5, 32.3, 49.2, 50.9, 91.5, 108.7, 110.0, 112.2, 125.4, 129.7, 139.8, 143.2, 152.8, 154.0, 154.7, 160.5, 180.3, 193.3.

**2'-Amino-8',8'-dimethyl-5-nitro-8',9'-dihydro-3'H-spiro[indoline-3,5'-pyrimido[4,5-*b*]quinoline]-2,4',6'(7'H,10'H)-trione (4e).**

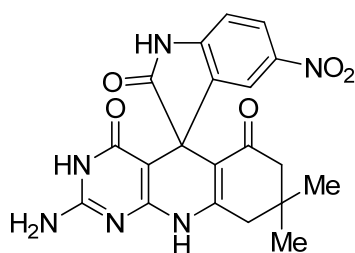

Cream powder (93%); mp >300 °C dec. IR (KBr) ( $\nu_{\max}$ /  $\text{cm}^{-1}$ ): 3427, 3185, 2923, 1720, 1662.  $^1\text{H}$  NMR (300 MHz,  $\text{DMSO-}d_6$ ):  $\delta_H$  (ppm) 0.92 (3H, s,  $\text{CH}_3$ ), 0.97 (3H, s,  $\text{CH}_3$ ), 1.90-2.06 (2H, m,  $\text{CH}_2$ ), 2.47 (2H, brs,  $\text{CH}_2$ ), 6.49 (2H, s,  $\text{NH}_2$ ), 6.80-8.03 (3H, m, H-Ar), 9.70 (1H, s, NH), 10.38 (1H, s, NH), 10.79 (1H, s, NH).  $^{13}\text{C}$  NMR (75 MHz,  $\text{DMSO-}d_6$ ):  $\delta_C$  (ppm) 27.4, 28.3, 32.4, 49.0, 50.7, 91.0, 108.0, 108.3, 117.8, 125.1, 138.3, 141.7, 150.6, 153.5, 154.2, 154.8, 160.7, 181.4, 193.6.

**2'-Amino-1,8,8'-trimethyl-8',9'-dihydro-3'H-spiro[indoline-3,5'-pyrimido[4,5-b]quinoline]-2,4',6'(7'H,10'H)-trione (4f).**

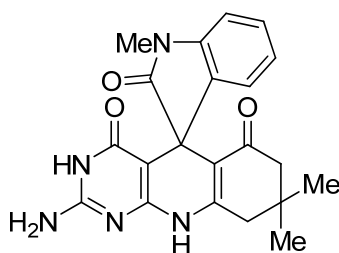

Cream powder (92%); mp >300 °C dec. IR (KBr) ( $\nu_{\max}$ /  $\text{cm}^{-1}$ ): 3330, 3176, 2940, 1691, 1652.  $^1\text{H}$  NMR (300 MHz,  $\text{DMSO-}d_6$ ):  $\delta_H$  (ppm) 0.89 (3H, s,  $\text{CH}_3$ ), 0.97 (3H, s,  $\text{CH}_3$ ), 1.81-2.05 (2H, m,  $\text{CH}_2$ ), 2.34-2.49 (2H, m,  $\text{CH}_2$ ), 3.05 (3H, s,  $\text{NCH}_3$ ), 6.40 (2H, s,  $\text{NH}_2$ ), 6.86-7.07 (4H, m, H-Ar), 9.51 (1H, s, NH), 10.13 (1H, s, NH).  $^{13}\text{C}$  NMR (75 MHz,  $\text{DMSO-}d_6$ ):  $\delta_C$  (ppm) 26.6, 27.0, 28.9, 32.3, 48.3, 50.9, 91.8, 106.8, 109.1, 121.4, 122.5, 127.3, 136.4, 145.1, 152.4, 153.9, 154.6, 160.4, 179.4, 193.1.

**5'-Nitro-8,9-dihydrospiro[chromeno[2,3-d]pyrimidine-5,3'-indoline]-2,2',4,6(1H,3H,7H)-tetraone (8a)**

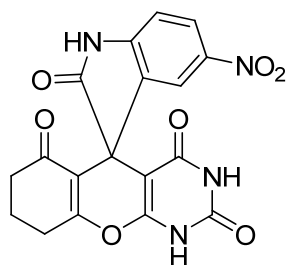

Colorless crystals (92%); mp 278-280 °C dec. IR (KBr) ( $\nu_{\max}$  / $\text{cm}^{-1}$ ): 3224, 1734, 1687, 1622.  $^1\text{H}$  NMR (300 MHz,  $\text{DMSO-}d_6$ ):  $\delta_{\text{H}}$  (ppm) 1.92 (2H, brs,  $\text{CH}_2$ ), 2.25 (2H, brs,  $\text{CH}_2$ ), 2.72 (2H, brs,  $\text{CH}_2$ ), 6.91 (1H, d,  $^3J_{\text{HH}} = 8.4$  Hz, H-Ar), 8.05 (1H, s, H-Ar), 8.09 (1H, d,  $^3J_{\text{HH}} = 8.4$  Hz, H-Ar), 11.11 (1H, s, NH), 11.16 (1H, s, NH), 12.31 (1H, brs, NH).  $^{13}\text{C}$  NMR (75 MHz,  $\text{DMSO-}d_6$ ):  $\delta_{\text{C}}$  (ppm) 20.0, 27.3, 37.0, 45.6, 88.6, 108.8, 113.6, 119.6, 126.1, 135.0, 142.3, 149.4, 150.9, 153.8, 162.2, 166.7, 179.0, 196.0.

**5'-Nitro-2-thioxo-2,3,8,9-tetrahydrospiro[chromeno[2,3-*d*]pyrimidine-5,3'-indoline]-2',4,6(1*H*,7*H*)-trione (8b)**

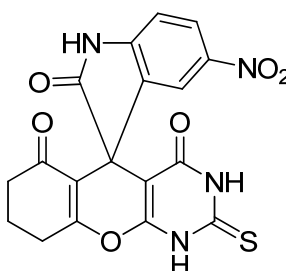

Colorless crystals (88%); mp >300 °C. IR (KBr) ( $\nu_{\max}$  / $\text{cm}^{-1}$ ): 3363, 3060, 1717, 1683, 1622.  $^1\text{H}$  NMR (300 MHz,  $\text{DMSO-}d_6$ ):  $\delta_{\text{H}}$  (ppm) 1.69-1.75 (2H, brs,  $\text{CH}_2$ ), 2.25 (2H, brs,  $\text{CH}_2$ ), 2.72 (2H, brs,  $\text{CH}_2$ ), 6.91 (1H, d,  $^3J_{\text{HH}} = 6.0$  Hz, H-Ar), 8.08-8.09 (2H, m, H-Ar), 11.20 (1H, s, NH), 12.48 (1H, s, NH), 13.75 (1H, brs, NH).  $^{13}\text{C}$  NMR (75 MHz,  $\text{DMSO-}d_6$ ):  $\delta_{\text{C}}$  (ppm) 19.9, 27.3, 37.0, 45.6, 93.2, 108.8, 113.4, 119.9, 126.2, 134.4, 142.4, 150.9, 153.2, 159.8, 166.6, 174.1, 175.5, 195.9.

**8,8-Dimethyl-8,9-dihydrospiro[chromeno[2,3-*d*]pyrimidine-5,3'-indoline]-2,2',4,6(1*H*,3*H*,7*H*)-tetraone (8c)**

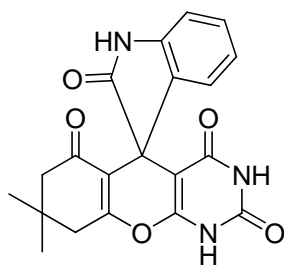

White powder (96%); mp >300 °C. IR (KBr) ( $\nu_{\max}$  / $\text{cm}^{-1}$ ): 3337, 3265, 1746, 1664, 1620.  $^1\text{H}$  NMR (300 MHz,  $\text{DMSO-}d_6$ ):  $\delta_{\text{H}}$  (ppm) 0.97 (3H, s,  $\text{CH}_3$ ), 1.03 (3H, s,  $\text{CH}_3$ ), 2.07, 2.10 (2H,  $\text{AB}_q$ ,  $^3J_{\text{AB}} = 15.9$  Hz,  $\text{CH}_2$ ), 2.55, 2.66 (2H,  $\text{AB}_q$ ,  $^3J_{\text{AB}} = 17.6$  Hz,  $\text{CH}_2$ ), 6.71 (1H, d,  $^3J_{\text{HH}} = 7.8$  Hz H-Ar), 6.78 (1H, t,  $^3J_{\text{HH}} = 7.5$  Hz H-Ar), 6.97 (1H, d,  $^3J_{\text{HH}} = 7.5$  Hz, H-Ar), 6.08 (1H, t,  $^3J_{\text{HH}} = 7.5$  Hz, H-Ar), 10.36 (1H, s, NH), 11.01 (1H, s, NH), 12.19 (1H, brs, NH).  $^{13}\text{C}$  NMR (75 MHz,  $\text{DMSO-}d_6$ ):  $\delta_{\text{C}}$  (ppm) 27.1, 28.2, 32.2, 45.5, 50.8, 89.6, 109.0, 113.6, 121.3, 123.3, 128.3, 134.0, 144.3, 149.4, 153.5, 161.9, 163.6, 178.2, 195.3.

**5'-Bromo-8,8-dimethyl-8,9-dihydrospiro[chromeno[2,3-*d*]pyrimidine-5,3'-indoline]-2,2',4,6(1H,3H,7H)-tetraone (8d)**

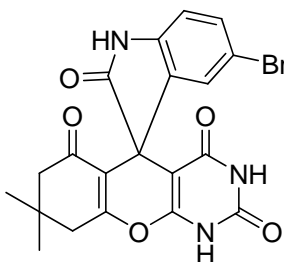

Colorless crystals (94%); mp >300 °C. IR (KBr) ( $\nu_{\max}$  / $\text{cm}^{-1}$ ): 3162, 3121, 3049, 1739, 1724, 16581, 1617.  $^1\text{H}$  NMR (300 MHz,  $\text{DMSO-}d_6$ ):  $\delta_{\text{H}}$  (ppm) 0.99 (3H, s,  $\text{CH}_3$ ), 1.02 (3H, s,  $\text{CH}_3$ ), 2.09-2.21 (2H, m,  $\text{CH}_2$ ), 2.60 (2H, brs,  $\text{CH}_2$ ), 6.67 (1H, d,  $^3J_{\text{HH}} = 8.7$  Hz, H-Ar), 7.23-7.25 (2H, m, H-Ar), 10.52 (1H, s, NH), 11.05 (1H, s, NH), 12.23 (1H, brs, NH).  $^{13}\text{C}$  NMR (75 MHz,  $\text{DMSO-}d_6$ ):  $\delta_{\text{C}}$  (ppm) 27.5, 27.8, 32.2, 45.7, 50.8, 89.0, 110.7, 112.9, 113.0, 126.3, 130.9, 136.4, 143.7, 149.5, 153.7, 162.0, 164.0, 177.9, 195.6.

**8,8-Dimethyl-5'-nitro-8,9-dihydrospiro[chromeno[2,3-*d*]pyrimidine-5,3'-indoline]-2,2',4,6(1H,3H,7H)-tetraone (8e)**

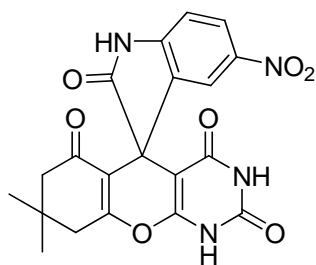

Colorless crystals (96%); mp 290-292 °C dec. IR (KBr) ( $\nu_{\max}$  / $\text{cm}^{-1}$ ): 3041, 2957, 1730, 1691, 1632.  $^1\text{H}$  NMR (300 MHz,  $\text{DMSO-}d_6$ ):  $\delta_{\text{H}}$  (ppm) 0.99 (3H, s,  $\text{CH}_3$ ), 1.02 (3H, s,  $\text{CH}_3$ ), 2.167 (2H, brs,  $\text{CH}_2$ ), 2.64 (2H, brs,  $\text{CH}_2$ ), 6.91 (1H, d,  $^3J_{\text{HH}} = 8.5$  Hz, H-Ar), 8.04 (1H, s, H-Ar), 8.04-8.11 (1H, m, H-Ar), 11.10 (1H, s, NH), 11.16(1H, s, NH), 12.31(1H, brs, NH).  $^{13}\text{C}$  NMR (75 MHz,  $\text{DMSO-}d_6$ ):  $\delta_{\text{C}}$  (ppm) 27.6, 27.7, 32.3, 45.6, 50.6, 88.5, 108.8, 112.6, 119.3, 126.1, 135.0, 142.3, 149.4, 151.0, 154.0, 162.2, 164.7, 178.9, 195.9.

**5',8,8-Trimethyl-8,9-dihydrospiro[chromeno[2,3-*d*]pyrimidine-5,3'-indoline]-2,2',4,6 (1*H*,3*H*,7*H*)-tetraone (8f)**

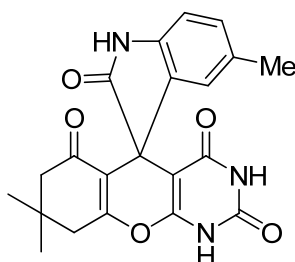

Colorless crystals (95%); mp 290-292 °C dec. IR (KBr) ( $\nu_{\max}$  / $\text{cm}^{-1}$ ): 3368, 3178, 2962, 1724, 1680, 1622.  $^1\text{H}$  NMR (300 MHz,  $\text{DMSO-}d_6$ ):  $\delta_{\text{H}}$  (ppm) 0.98 (3H, s,  $\text{CH}_3$ ), 1.02 (3H, s,  $\text{CH}_3$ ), 2.06-2.21 (2H, m,  $\text{CH}_2$ ), 2.59-2.61 (2H, m,  $\text{CH}_2$ ), 3.66 (3H, s,  $\text{CH}_3$ ), 6.59 (1H, d,  $^3J_{\text{HH}} = 7.8$  Hz, H-Ar), 7.81 (1H, s, H-Ar), 7.87 (1H, d,  $^3J_{\text{HH}} = 7.8$  Hz, H-Ar), 10.26 (1H, s, NH), 11.01 (1H, s, NH), 12.19 (1H, s, NH).  $^{13}\text{C}$  NMR (75 MHz,  $\text{DMSO-}d_6$ ):  $\delta_{\text{C}}$  (ppm) 19.0, 21.1, 27.3, 28.0, 32.0, 45.5, 49.9, 89.7, 108.7, 113.6, 124.0, 128.5, 130.0, 134.1, 141.8, 149.5, 153.4, 161.9, 163.5, 178.1, 195.3.

**5'-Bromo-8,8-dimethyl-2-thioxo-2,3,8,9-tetrahydrospiro[chromeno[2,3-*d*]pyrimidine-5,3'-indoline]-2',4,6(1*H*,7*H*)-trione (8g)**



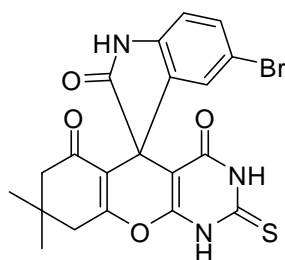

Colorless crystals (90%); mp 280-282 °C. IR (KBr) ( $\nu_{\max}$  / $\text{cm}^{-1}$ ): 3060, 2967, 1711, 1708.  $^1\text{H}$  NMR (300 MHz,  $\text{DMSO-}d_6$ ):  $\delta_{\text{H}}$  (ppm) 0.99 (3H, s,  $\text{CH}_3$ ), 1.02 (3H, s,  $\text{CH}_3$ ), 2.16 (2H, brs,  $\text{CH}_2$ ), 2.60 (2H, brs,  $\text{CH}_2$ ), 6.67 (1H, d,  $^3J_{\text{HH}} = 8.1$  Hz, H-Ar), 7.25 (1H, d,  $^3J_{\text{HH}} = 7.2$  Hz, H-Ar), 7.33 (1H, s, H-Ar), 10.58 (1H, s, NH), 12.45 (1H, s, NH), 13.68 (1H, brs, NH).  $^{13}\text{C}$  NMR (75 MHz,  $\text{DMSO-}d_6$ ):  $\delta_{\text{C}}$  (ppm) 27.5, 27.8, 32.3, 45.7, 50.7, 93.7, 110.8, 112.9, 113.0, 126.6, 131.1, 135.8, 143.7, 153.1, 159.7, 164.0, 174.1, 177.4, 195.5.

**8,8-Dimethyl-5'-nitro-2-thioxo-2,3,8,9-tetrahydrospiro[chromeno[2,3-d]pyrimidine-5,3'-indoline]-2',4,6(1H,7H)-trione (8h)**

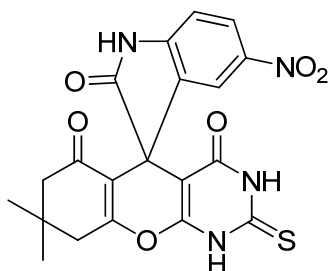

Colorless crystals (92%); mp >300 °C. IR (KBr) ( $\nu_{\max}$  / $\text{cm}^{-1}$ ): 3383, 3337, 2962, 1730, 1684, 1627.  $^1\text{H}$  NMR (300 MHz,  $\text{DMSO-}d_6$ ):  $\delta_{\text{H}}$  (ppm) 1.00-1.07 (6H, m, 2 $\text{CH}_3$ ), 2.17 (2H, brs,  $\text{CH}_2$ ), 2.63 (2H, brs,  $\text{CH}_2$ ), 6.93 (1H, d,  $^2J_{\text{AB}} = 8.1$  Hz, H-Ar), 8.09-8.14 (2H, m, H-Ar), 11.21 (1H, s, NH), 12.48 (1H, s, NH), 13.76 (1H, brs, NH).  $^{13}\text{C}$  NMR (75 MHz,  $\text{DMSO-}d_6$ ):  $\delta_{\text{C}}$  (ppm) 19.0, 27.6, 32.3, 45.5, 50.5, 56.5, 93.2, 108.9, 112.4, 119.7, 126.2, 134.4, 142.4, 150.9, 153.4, 160.0, 164.7, 174.2, 195.8.

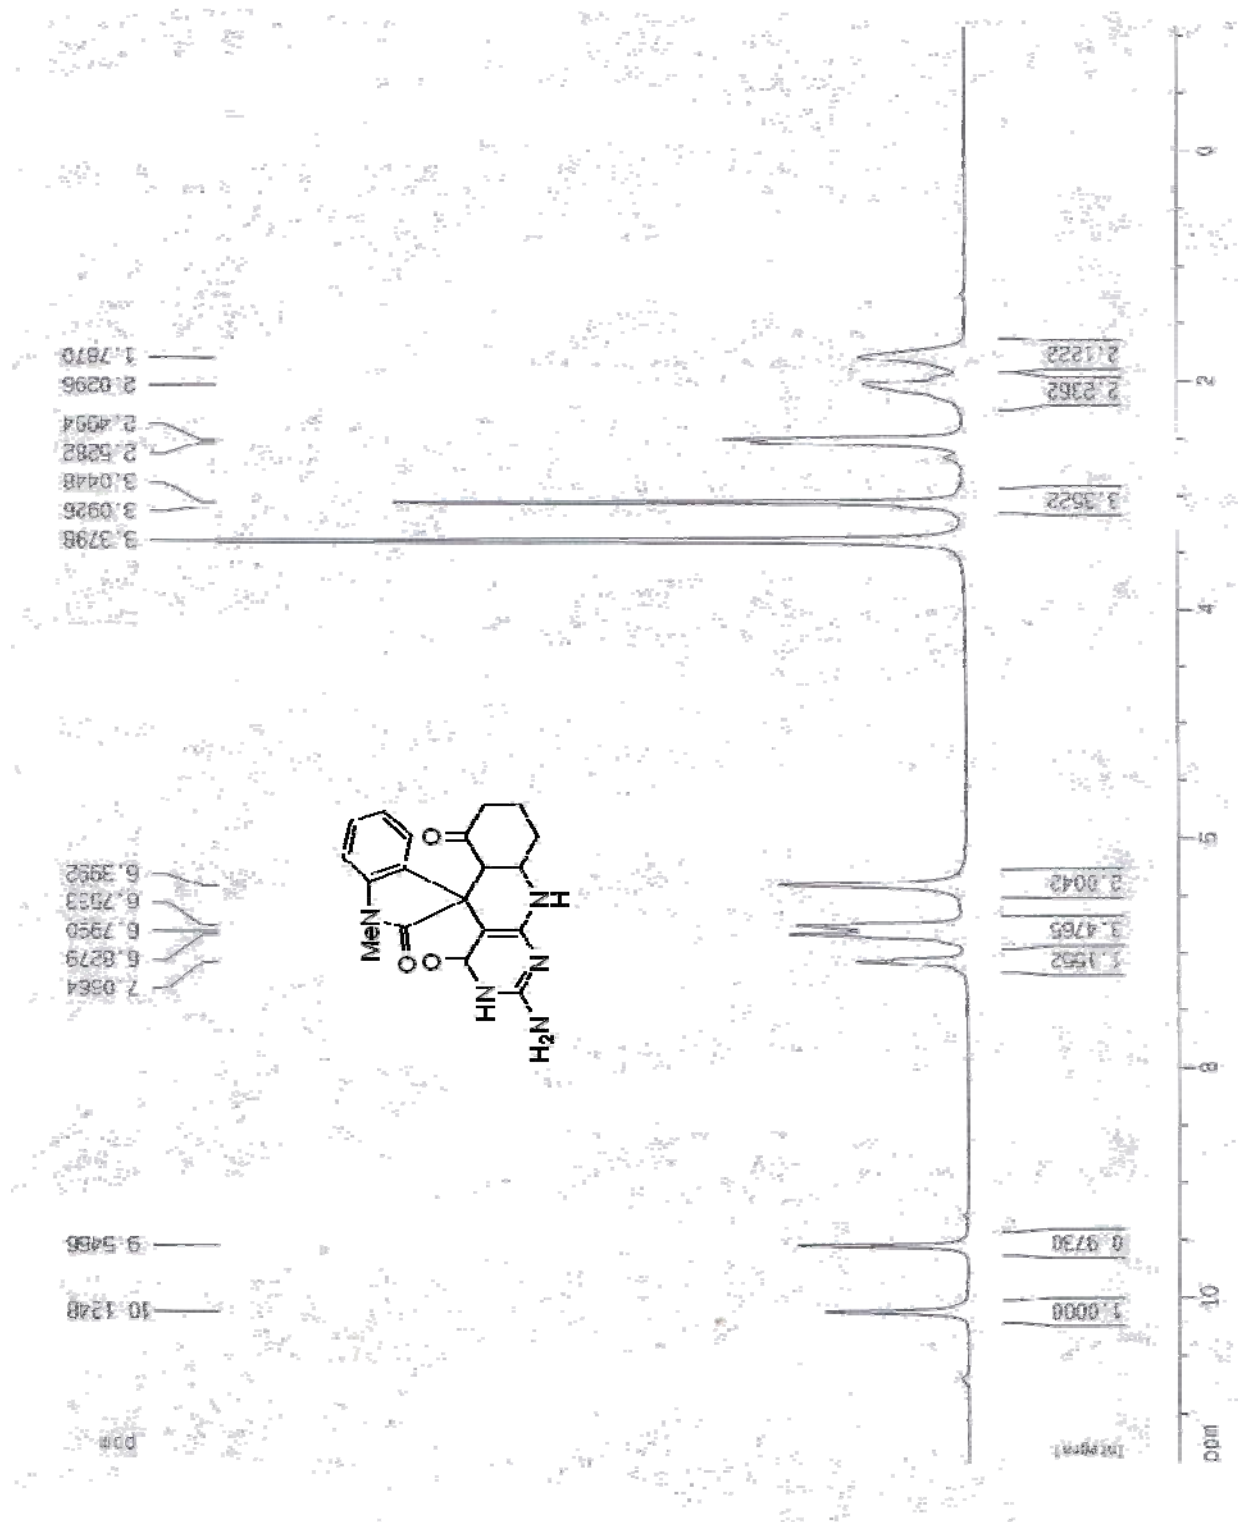

<sup>1</sup>H NMR of 4a

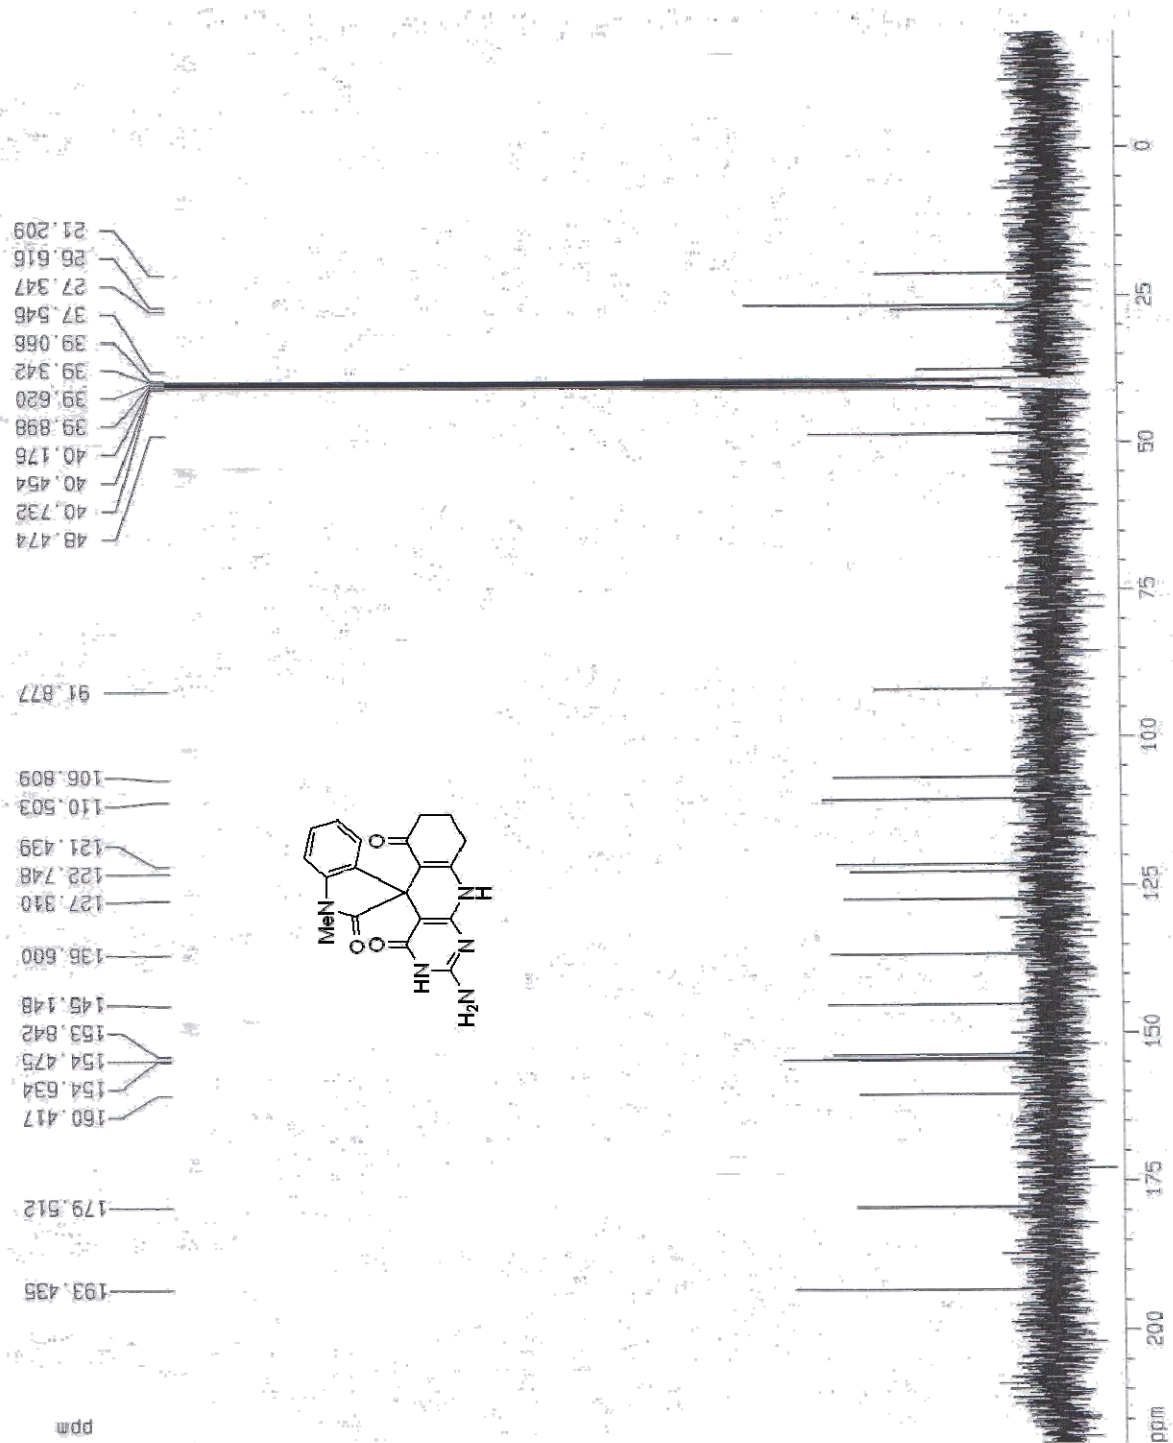

<sup>13</sup>C NMR of 4a

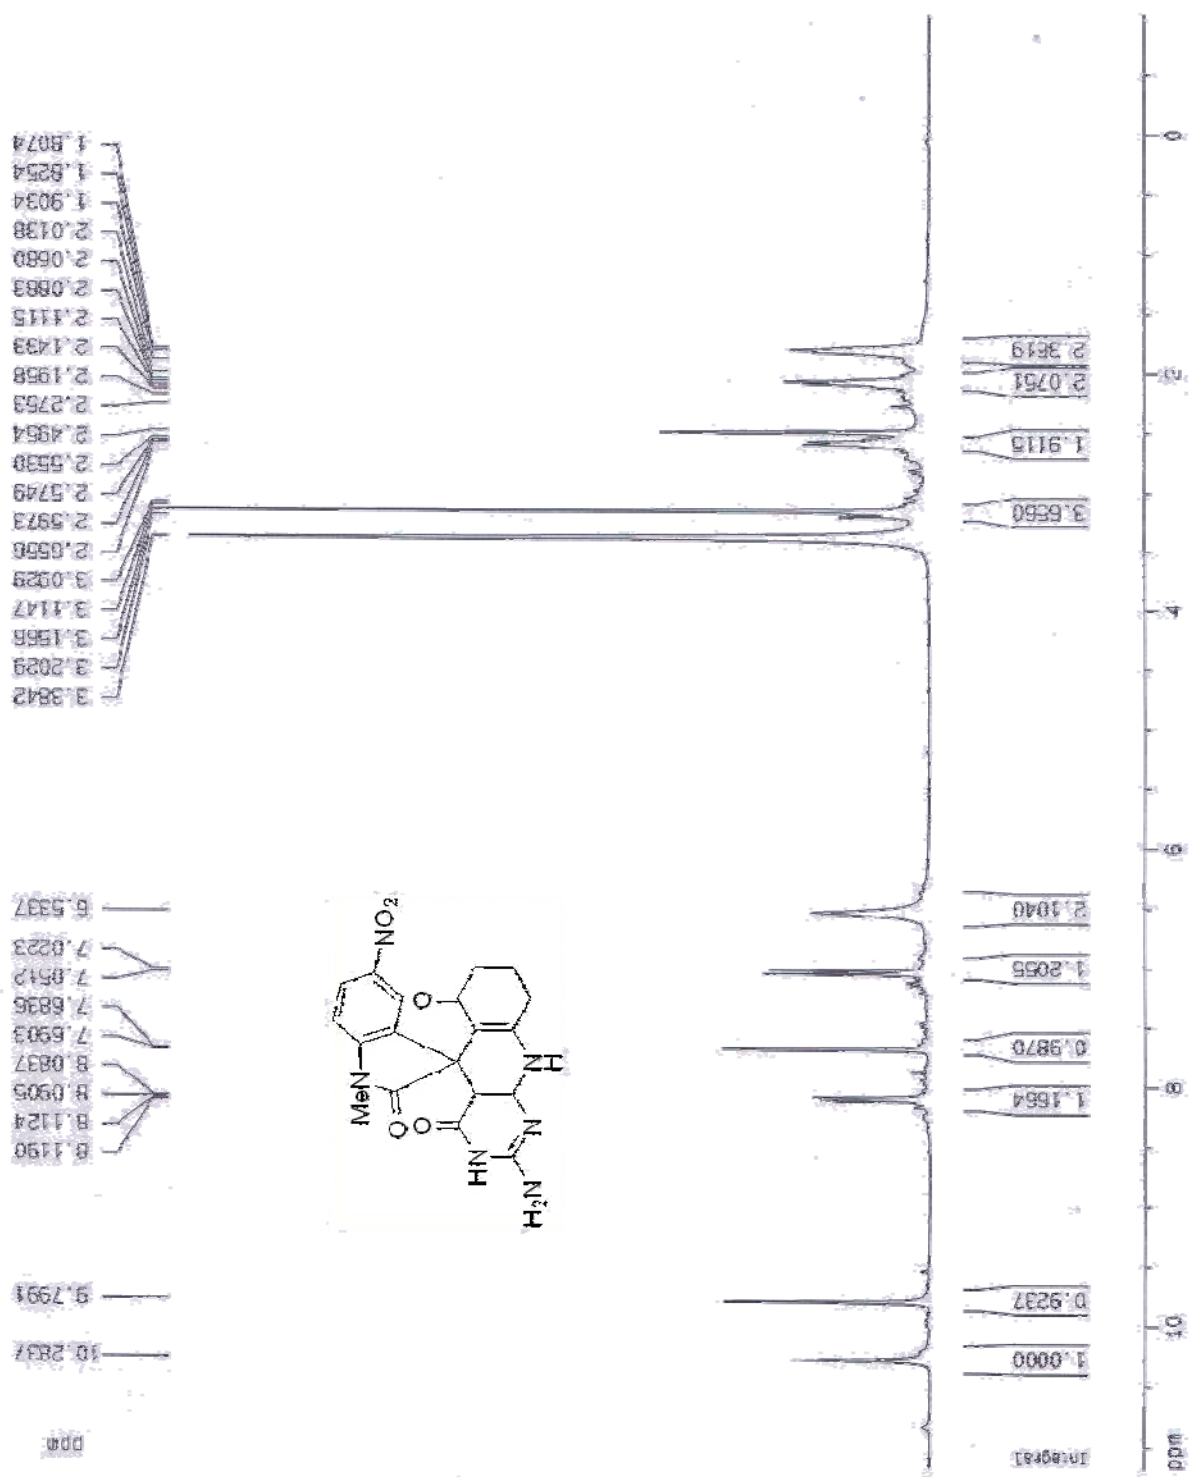

$^1\text{H NMR}$  of **4b**

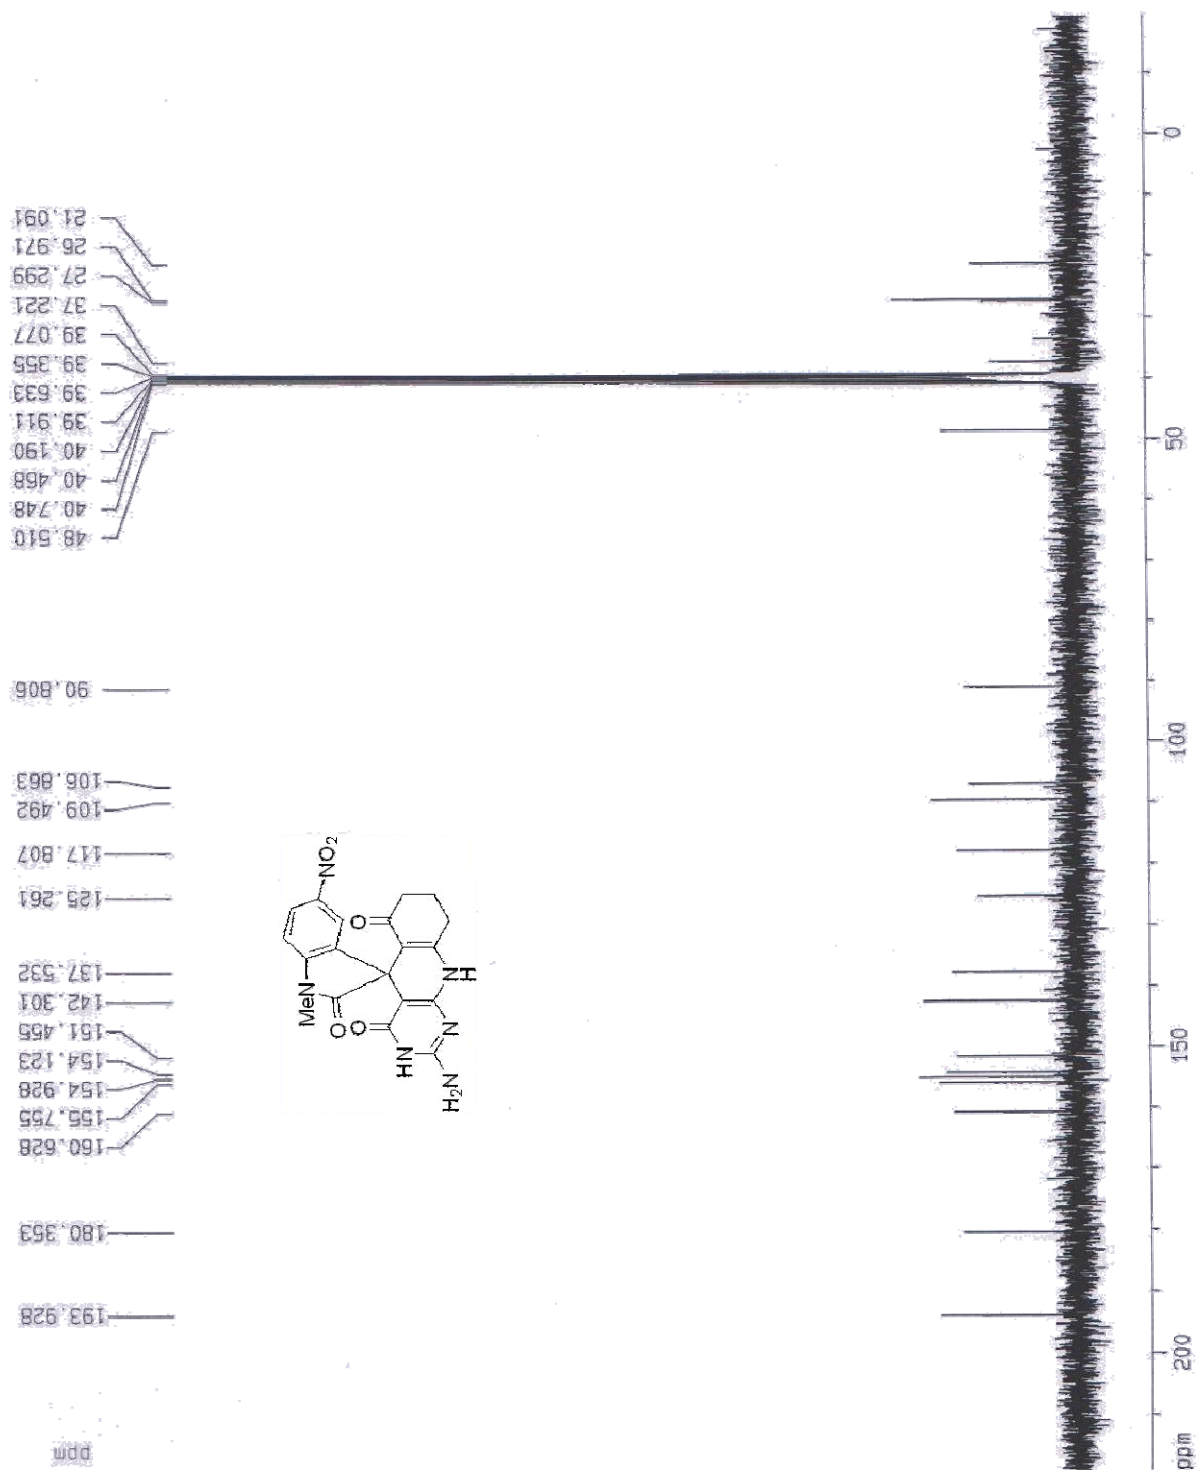

$^{13}\text{C}$  NMR of **4b**

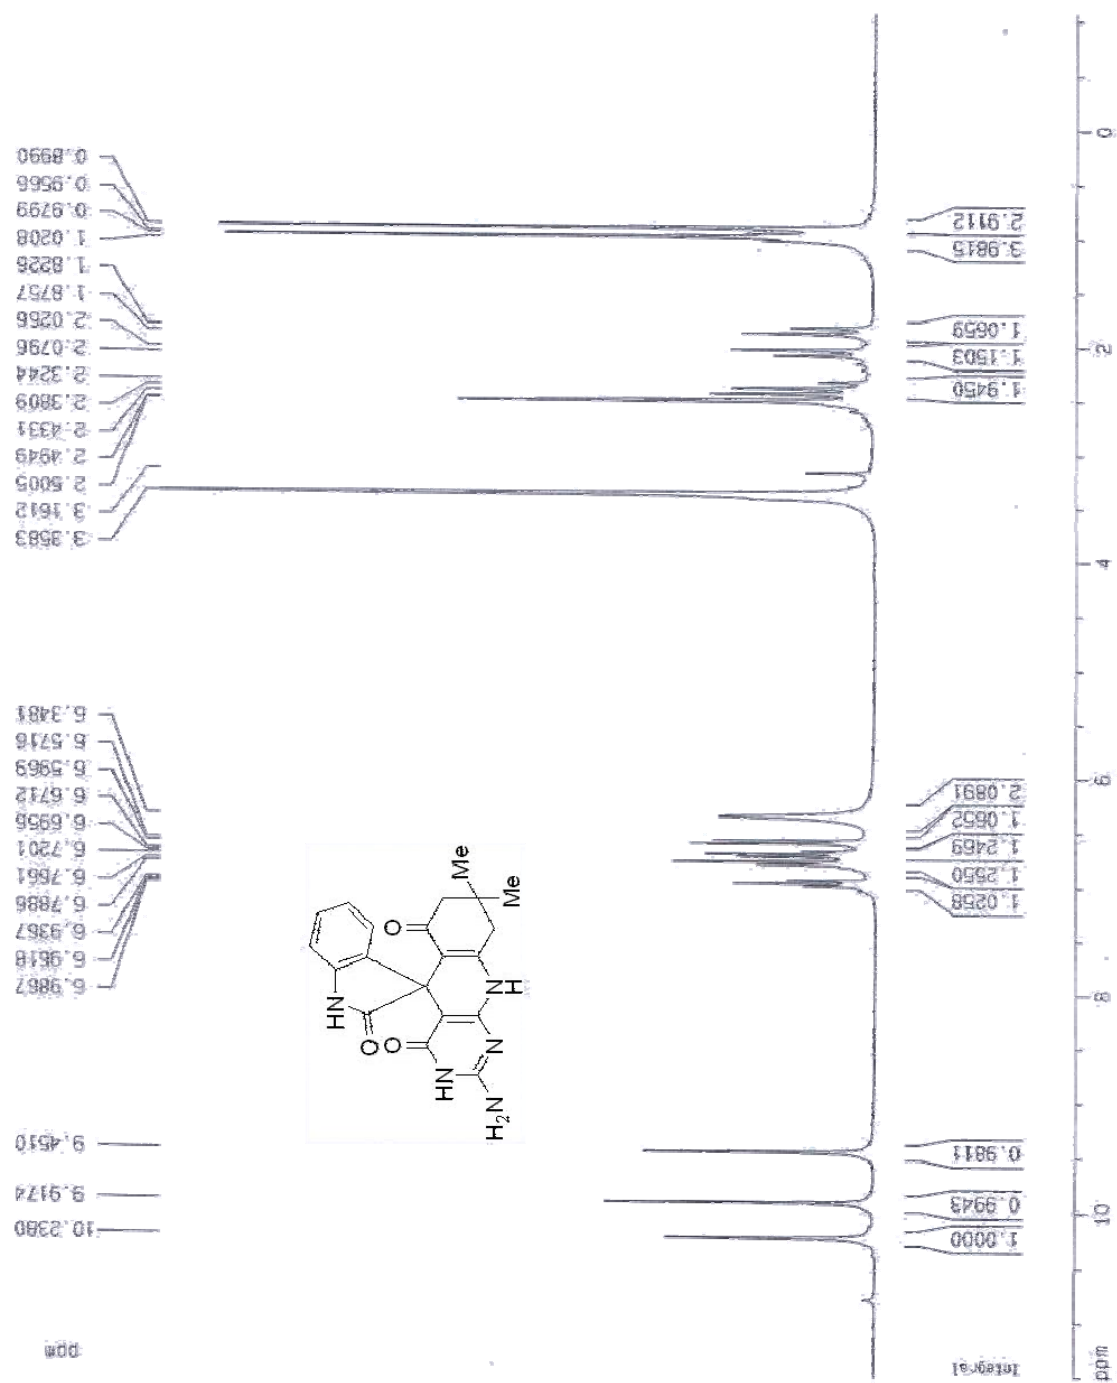

<sup>1</sup>H NMR of **4c**

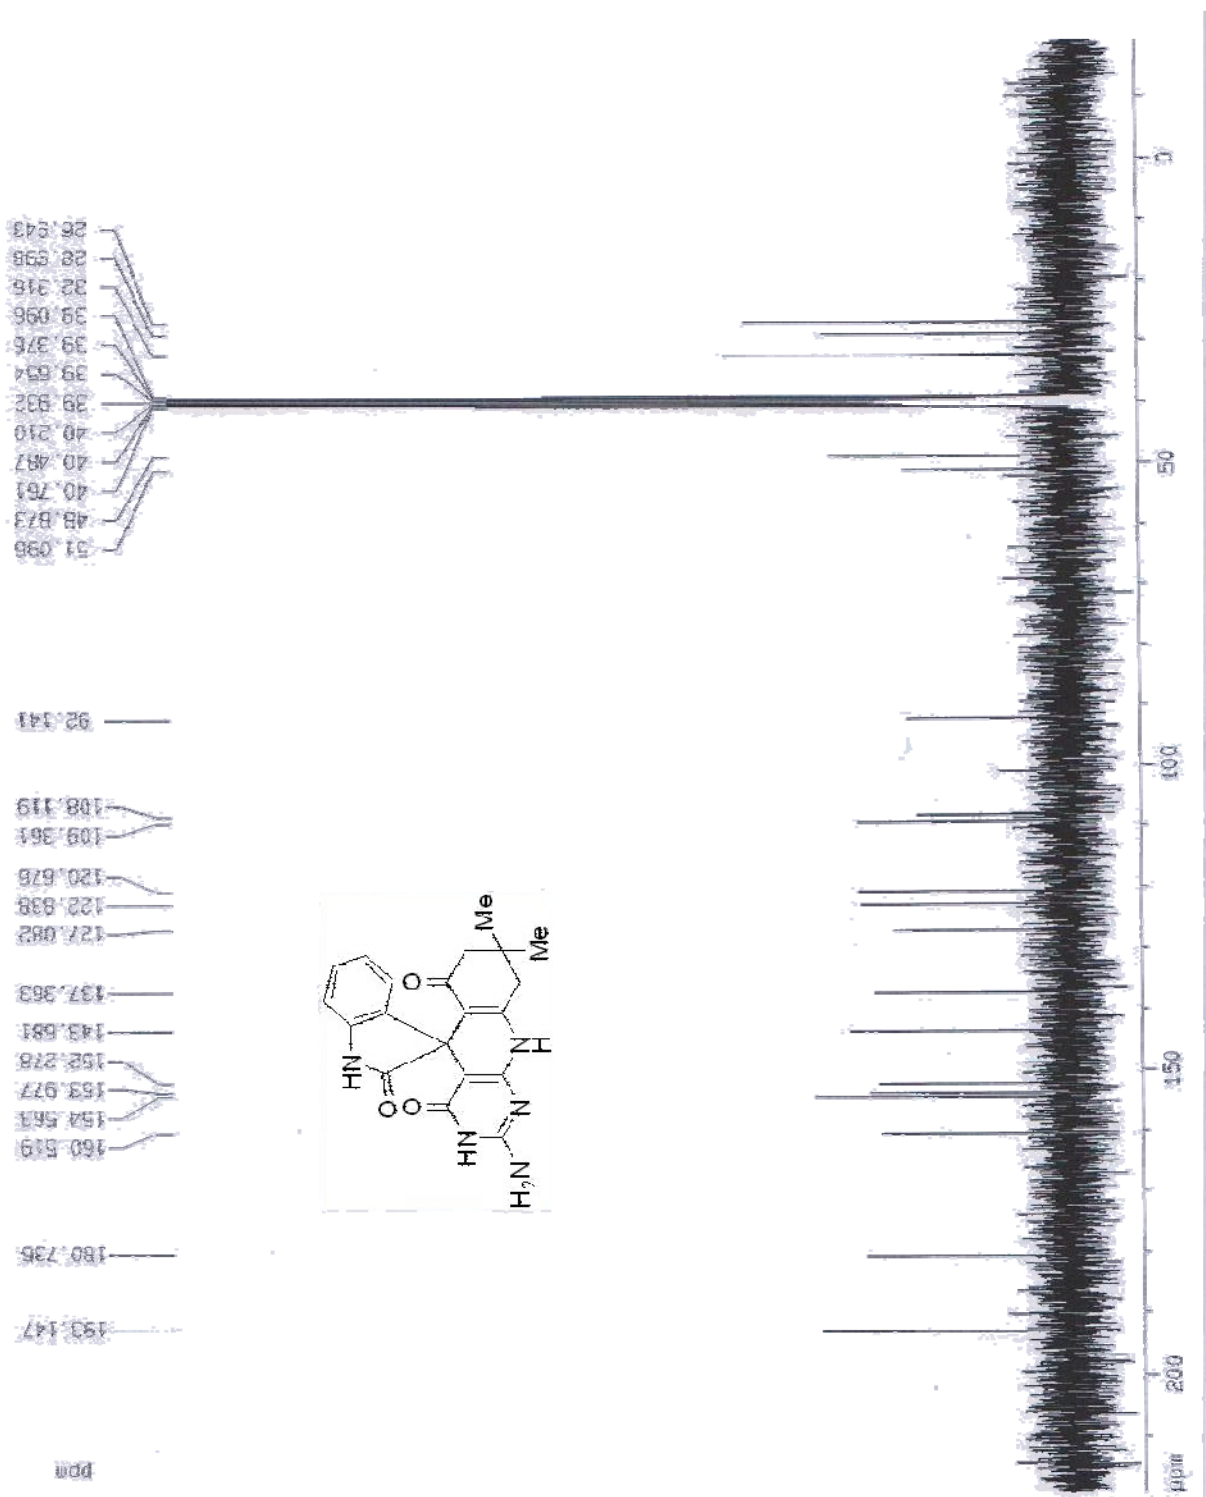

<sup>13</sup>C NMR of 4c

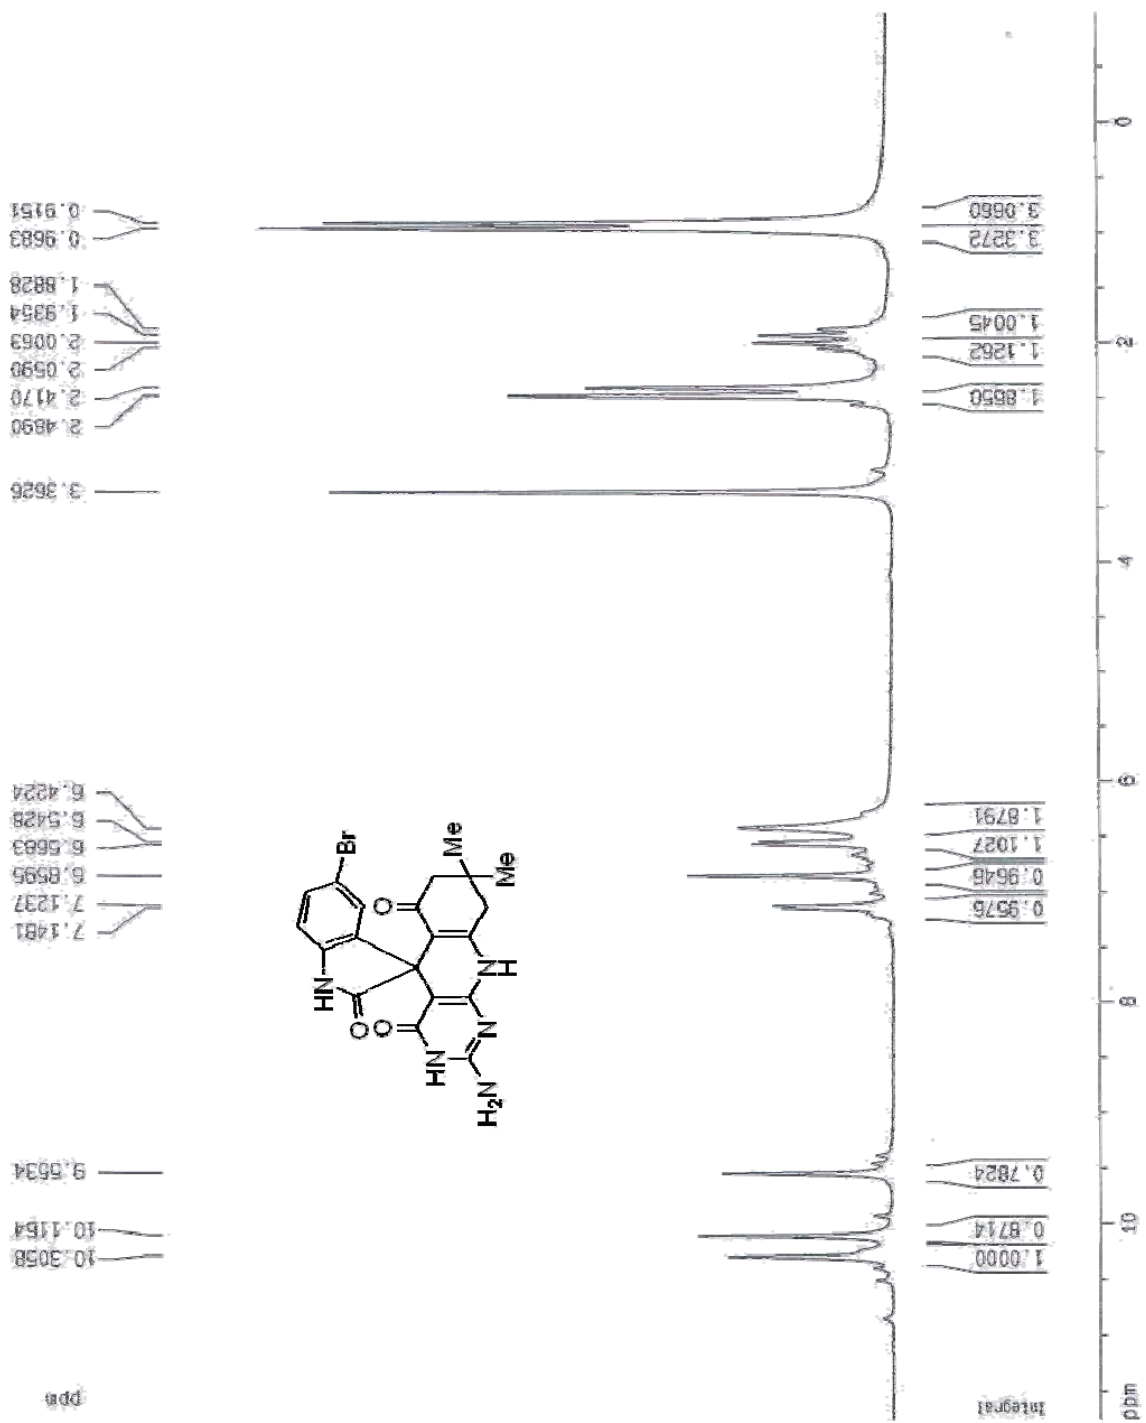

$^1\text{H NMR}$  of **4d**



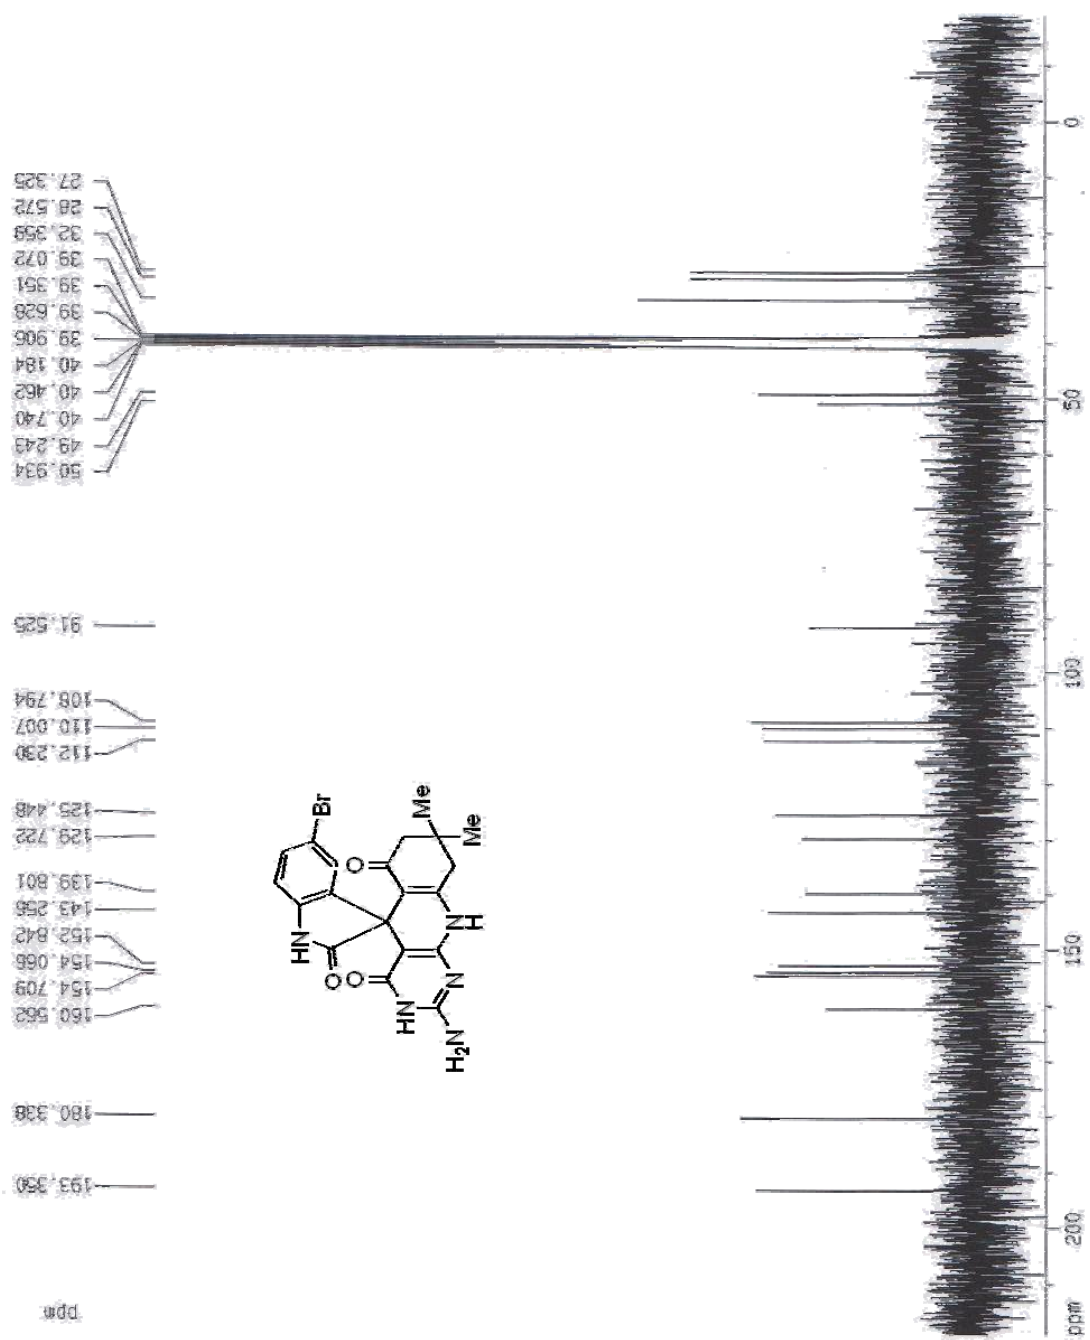

<sup>13</sup>C NMR of **4d**

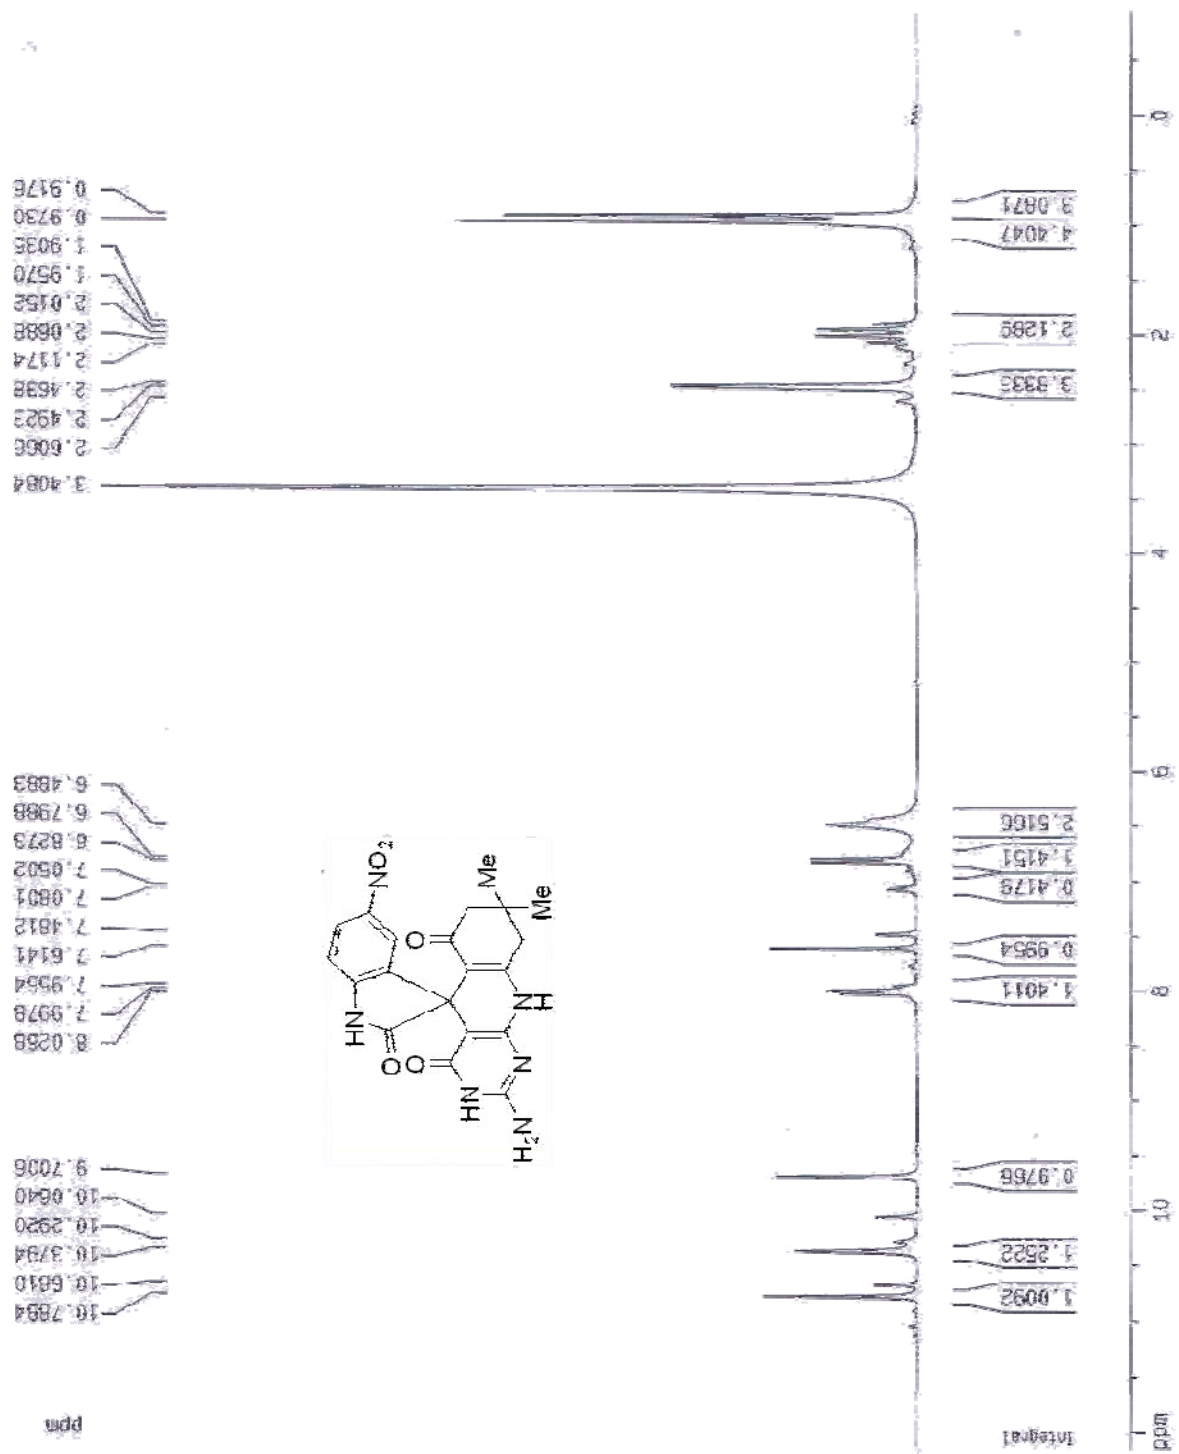

<sup>1</sup>H NMR of 4e

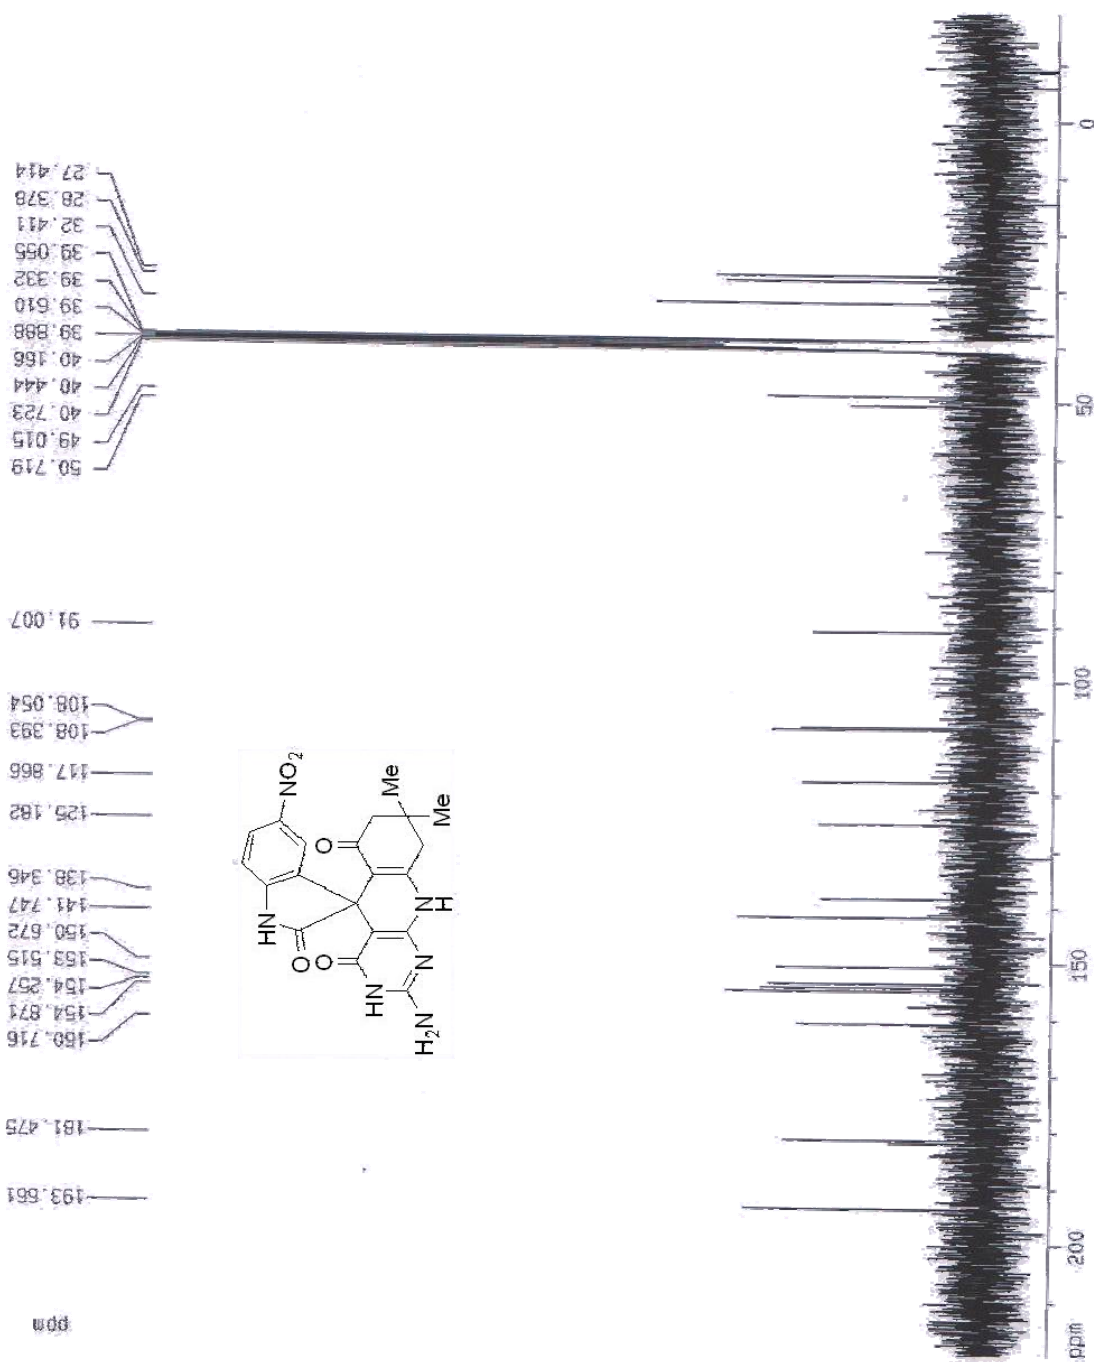

$^{13}\text{C}$  NMR of **4e**

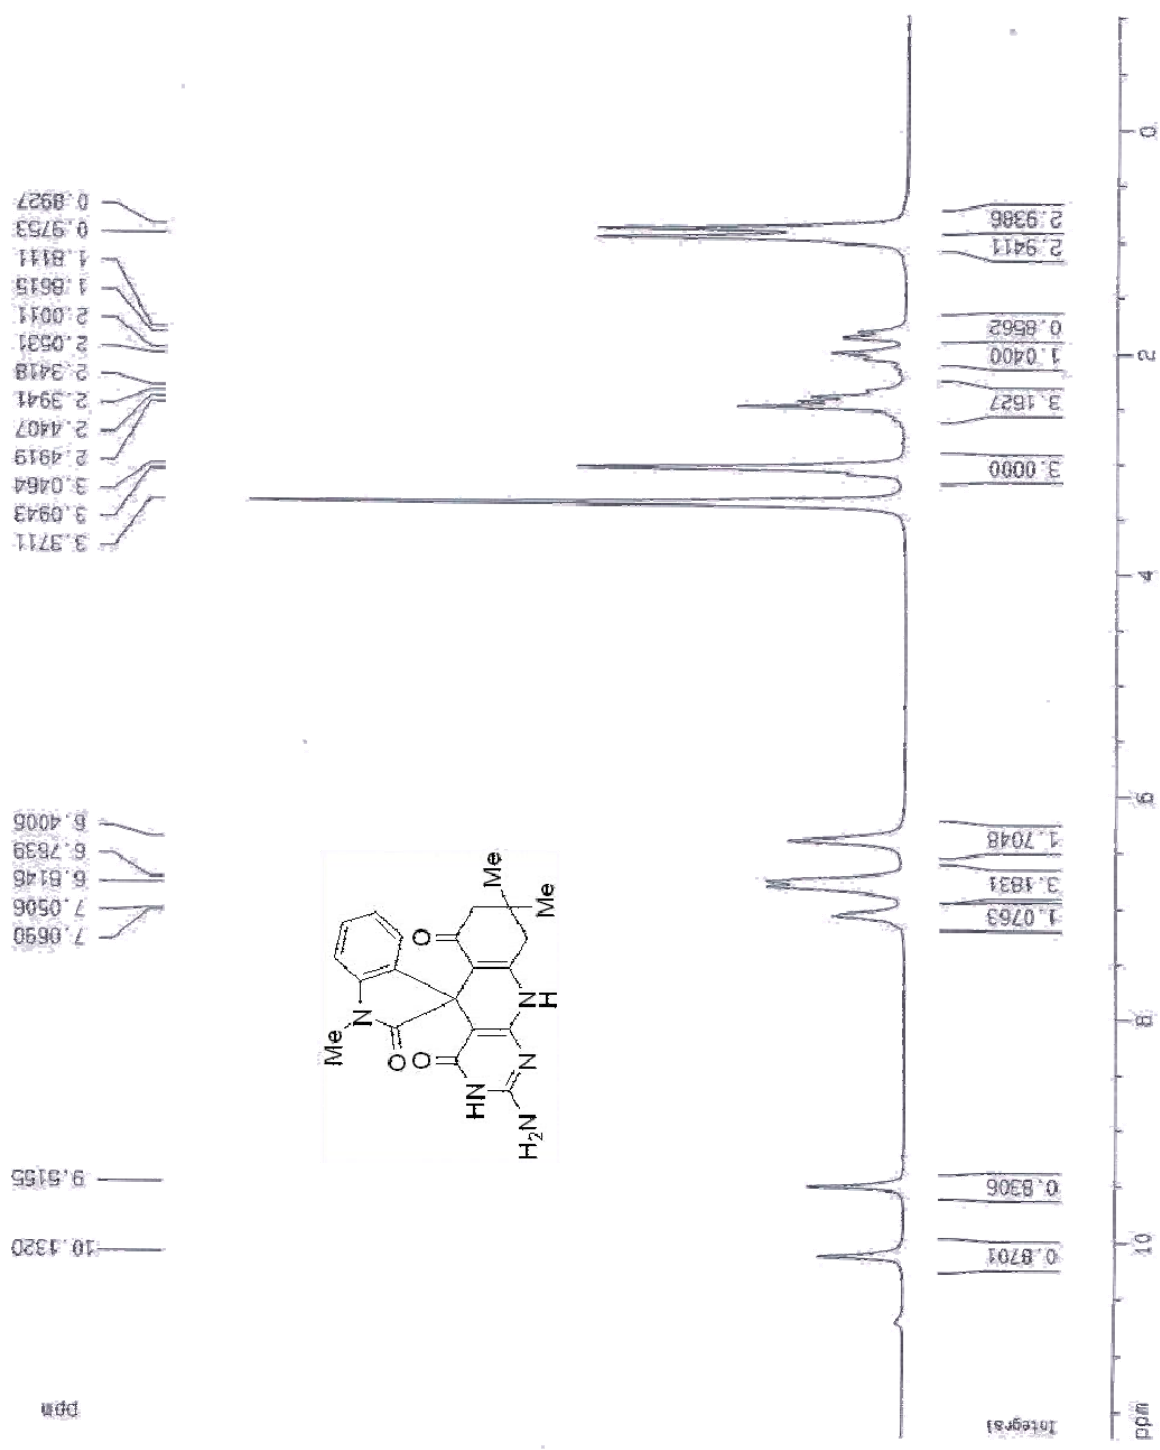

<sup>1</sup>H NMR of 4f

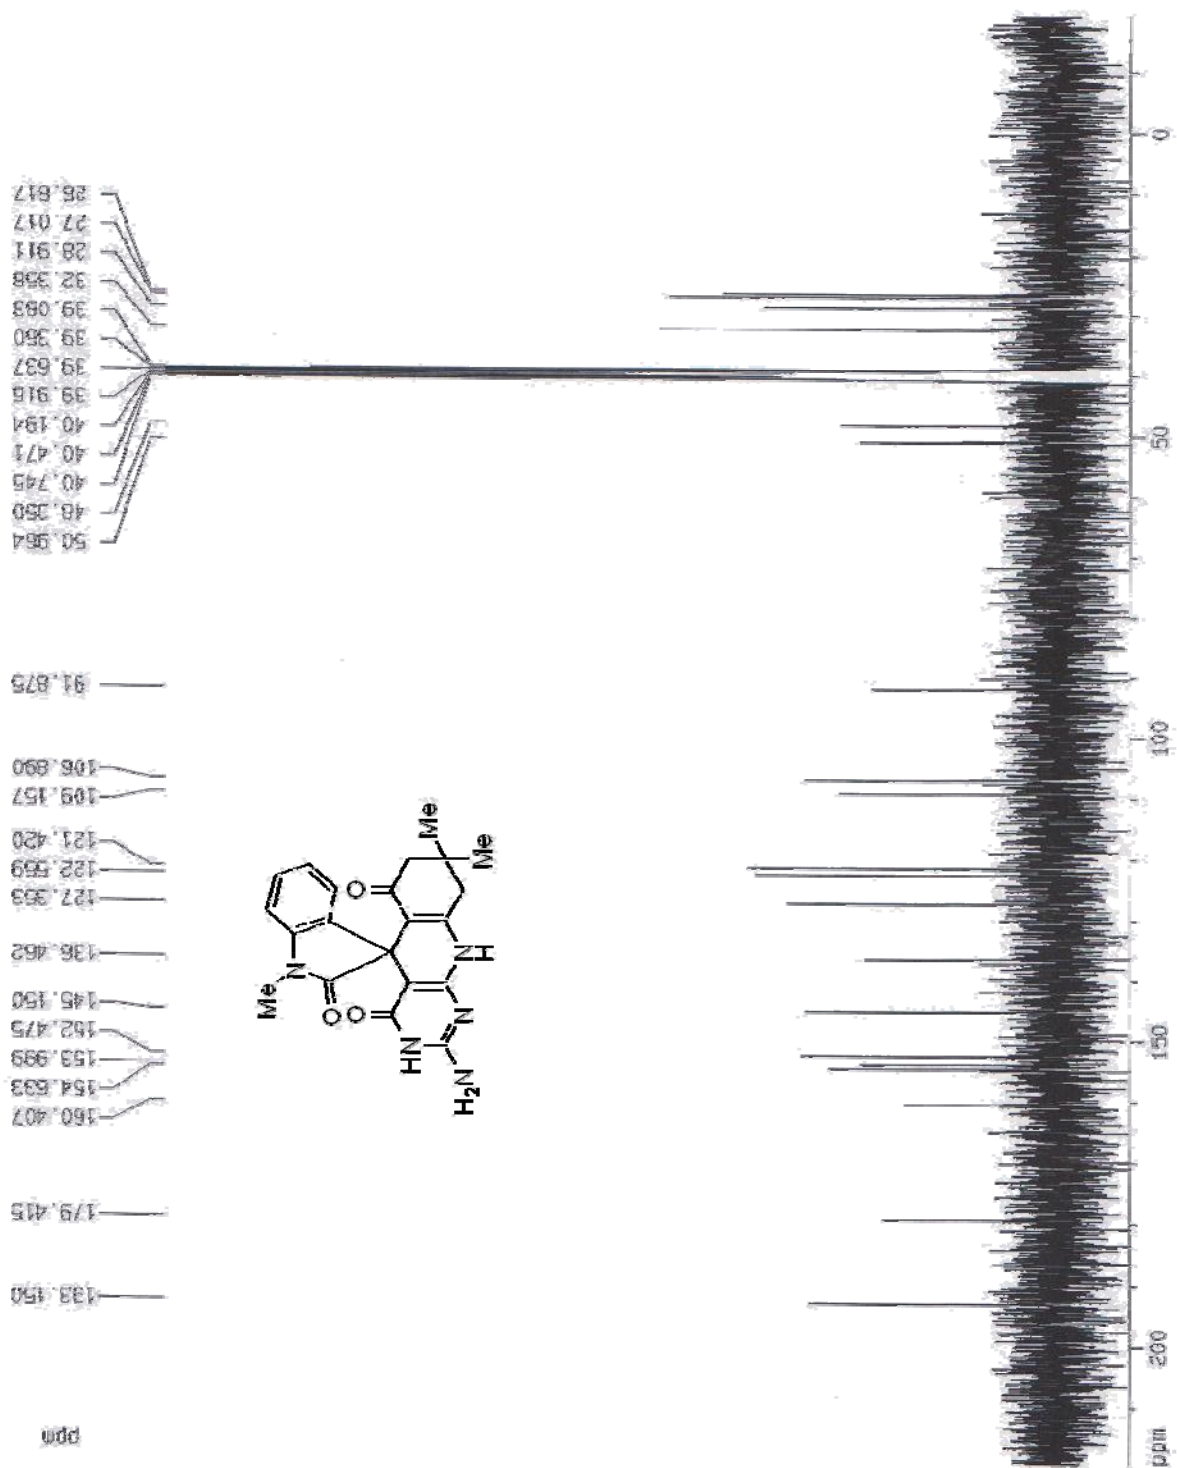

$^{13}\text{C}$  NMR of **4f**

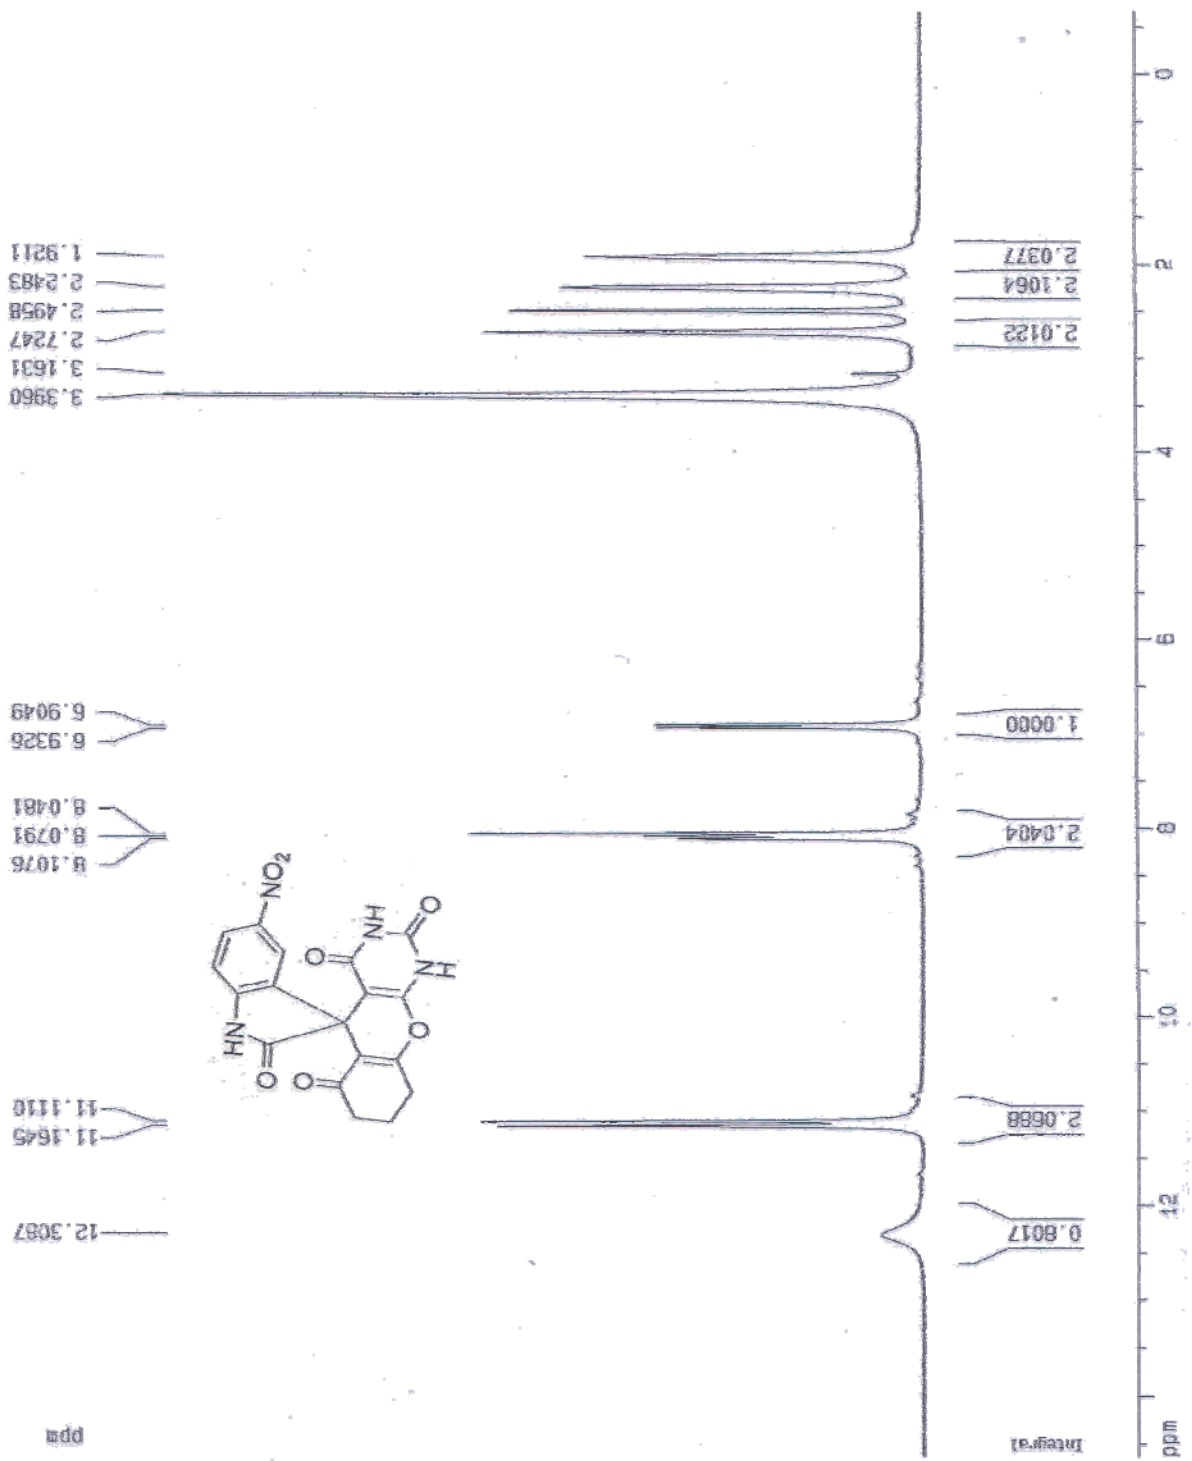

<sup>1</sup>H NMR of 8a

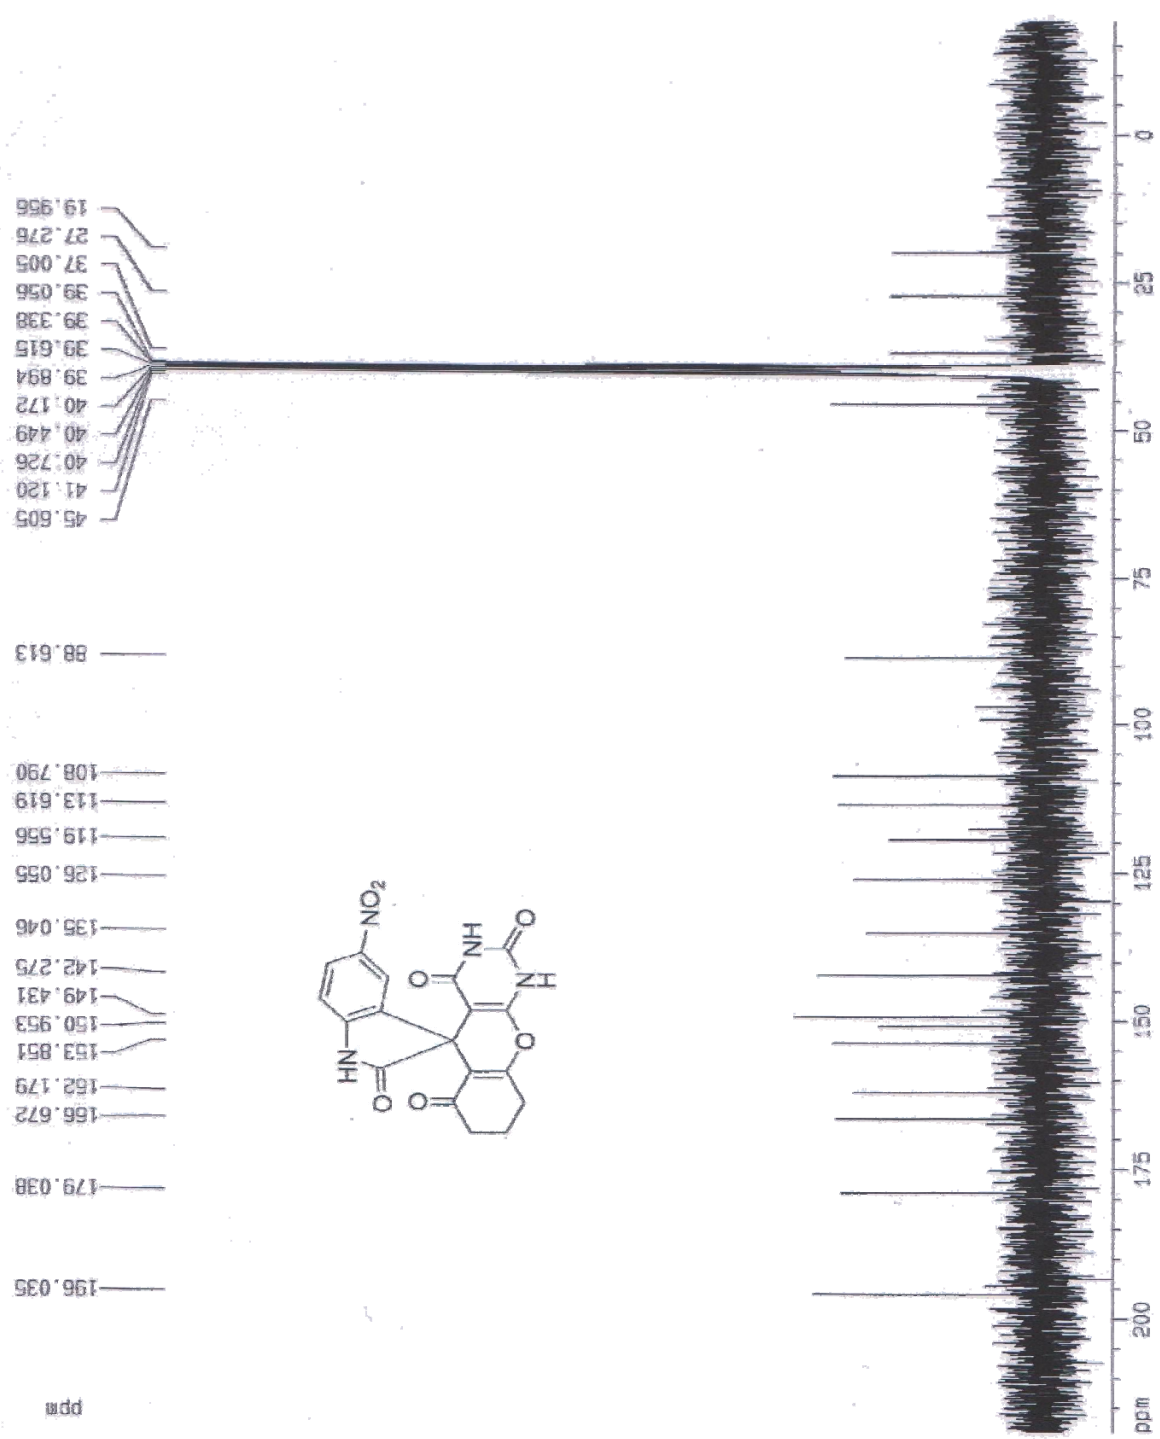

$^{13}\text{C}$  NMR of 8a

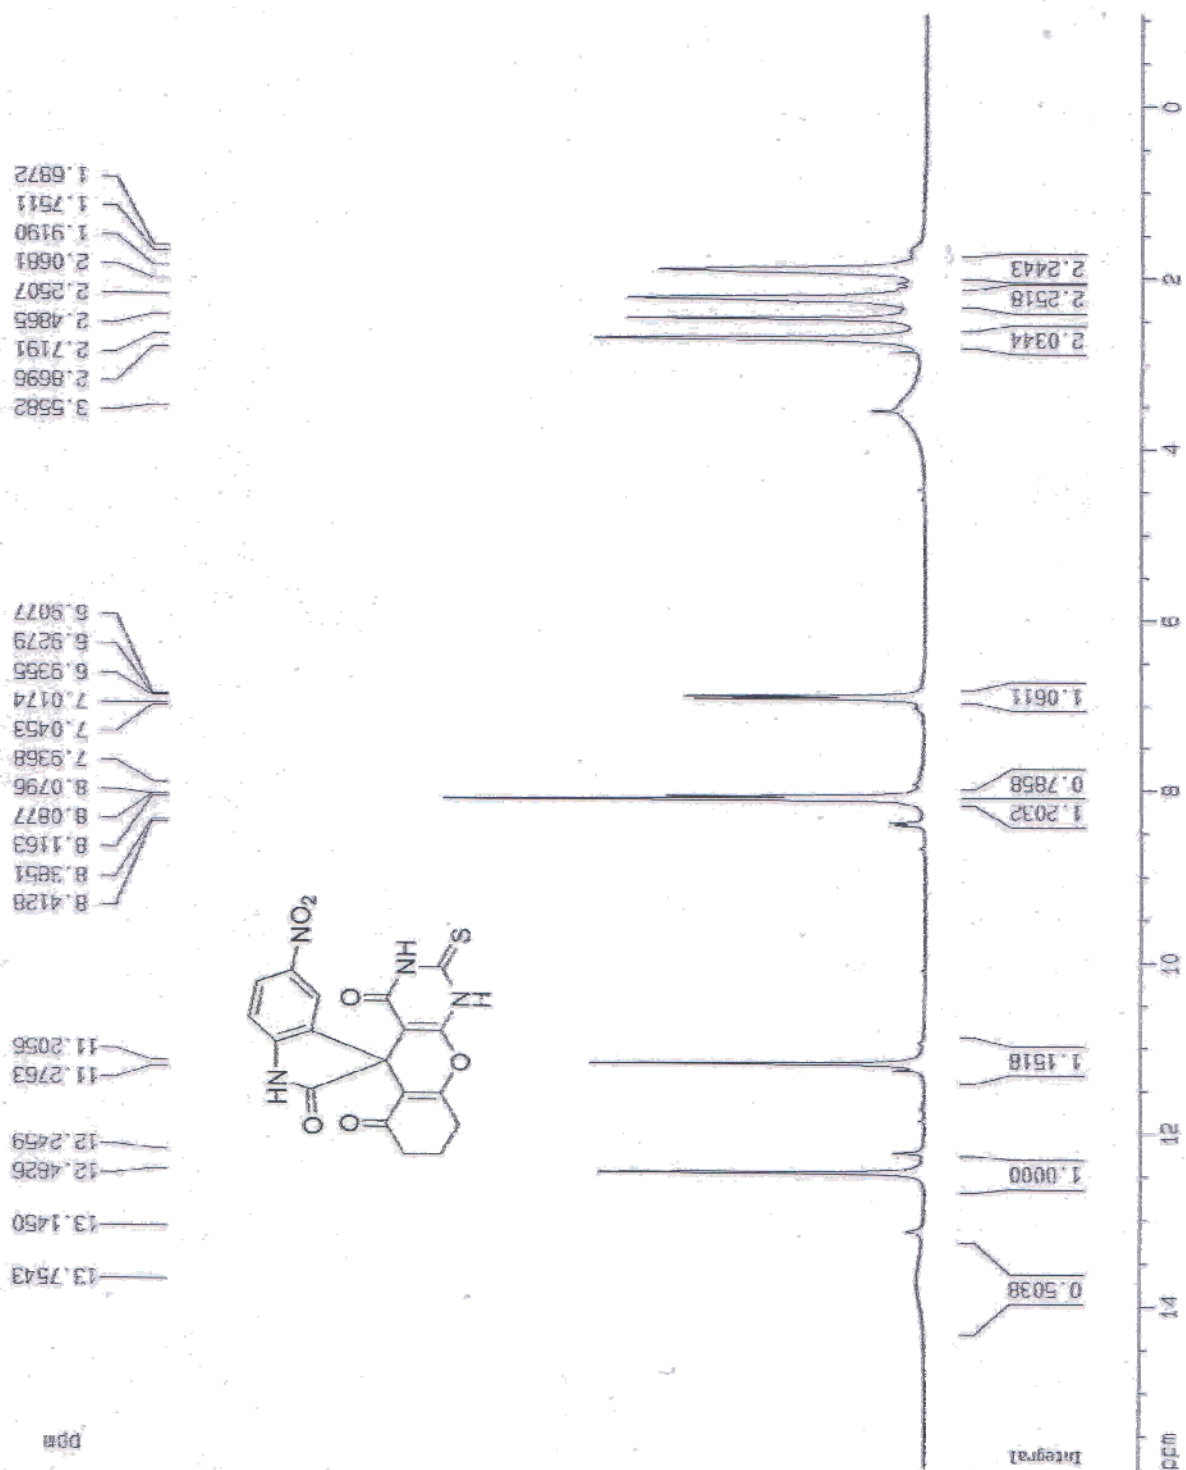

$^1\text{H}$  NMR of **8b**



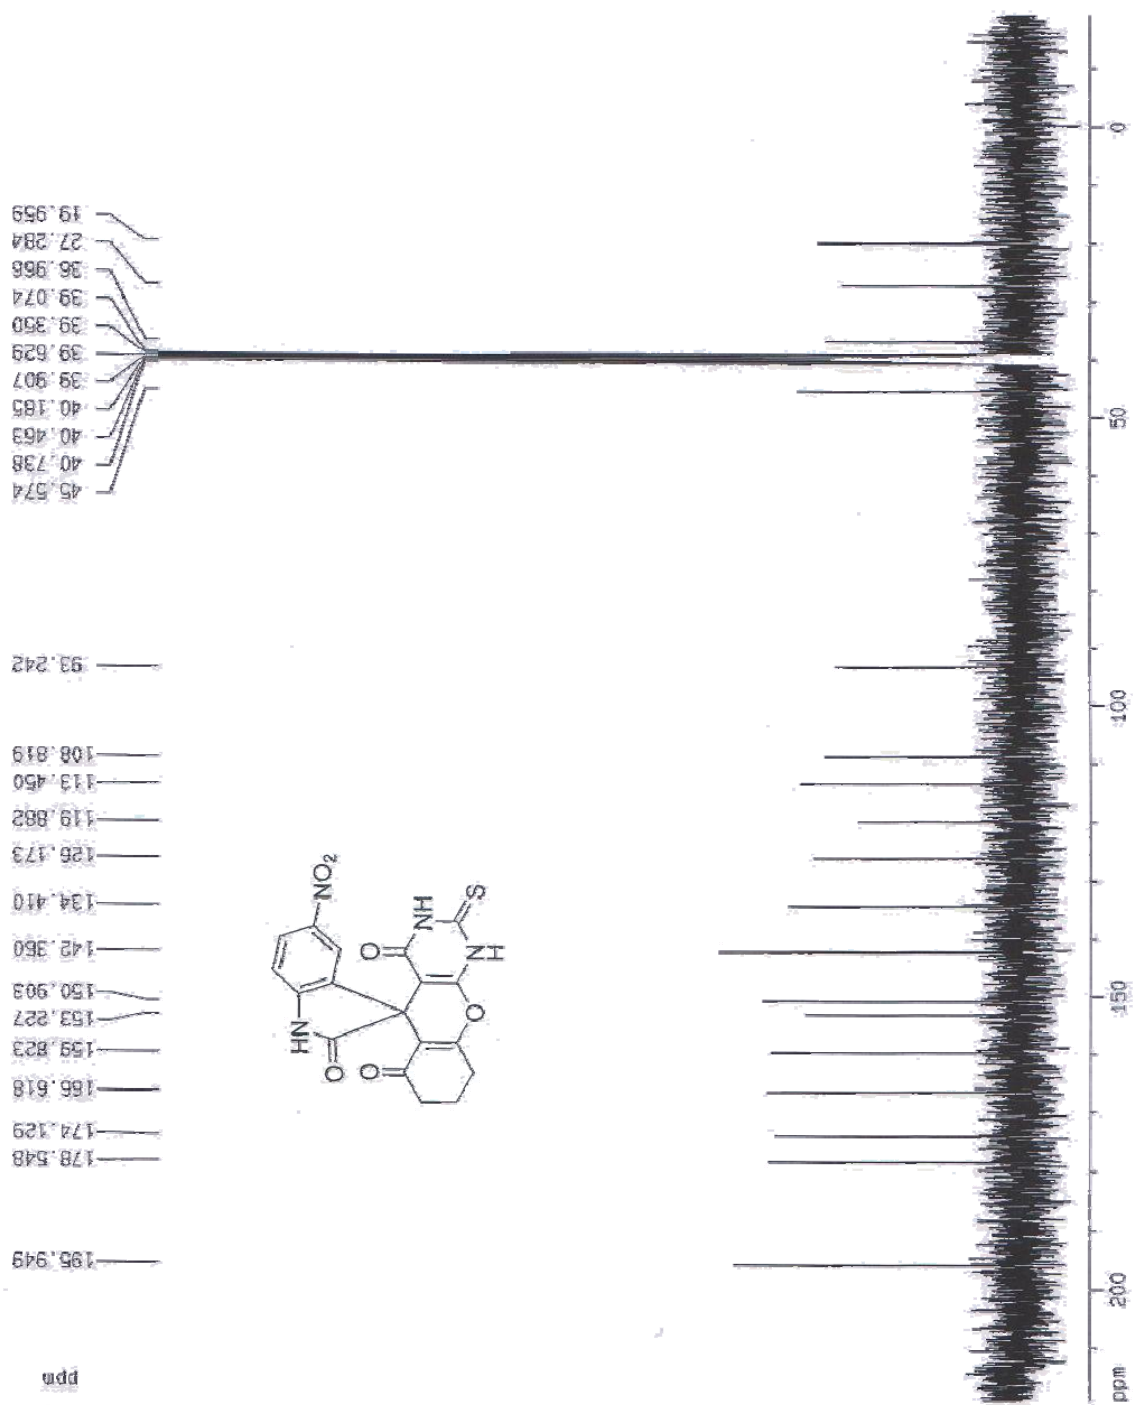

$^{13}\text{C}$  NMR of **8b**

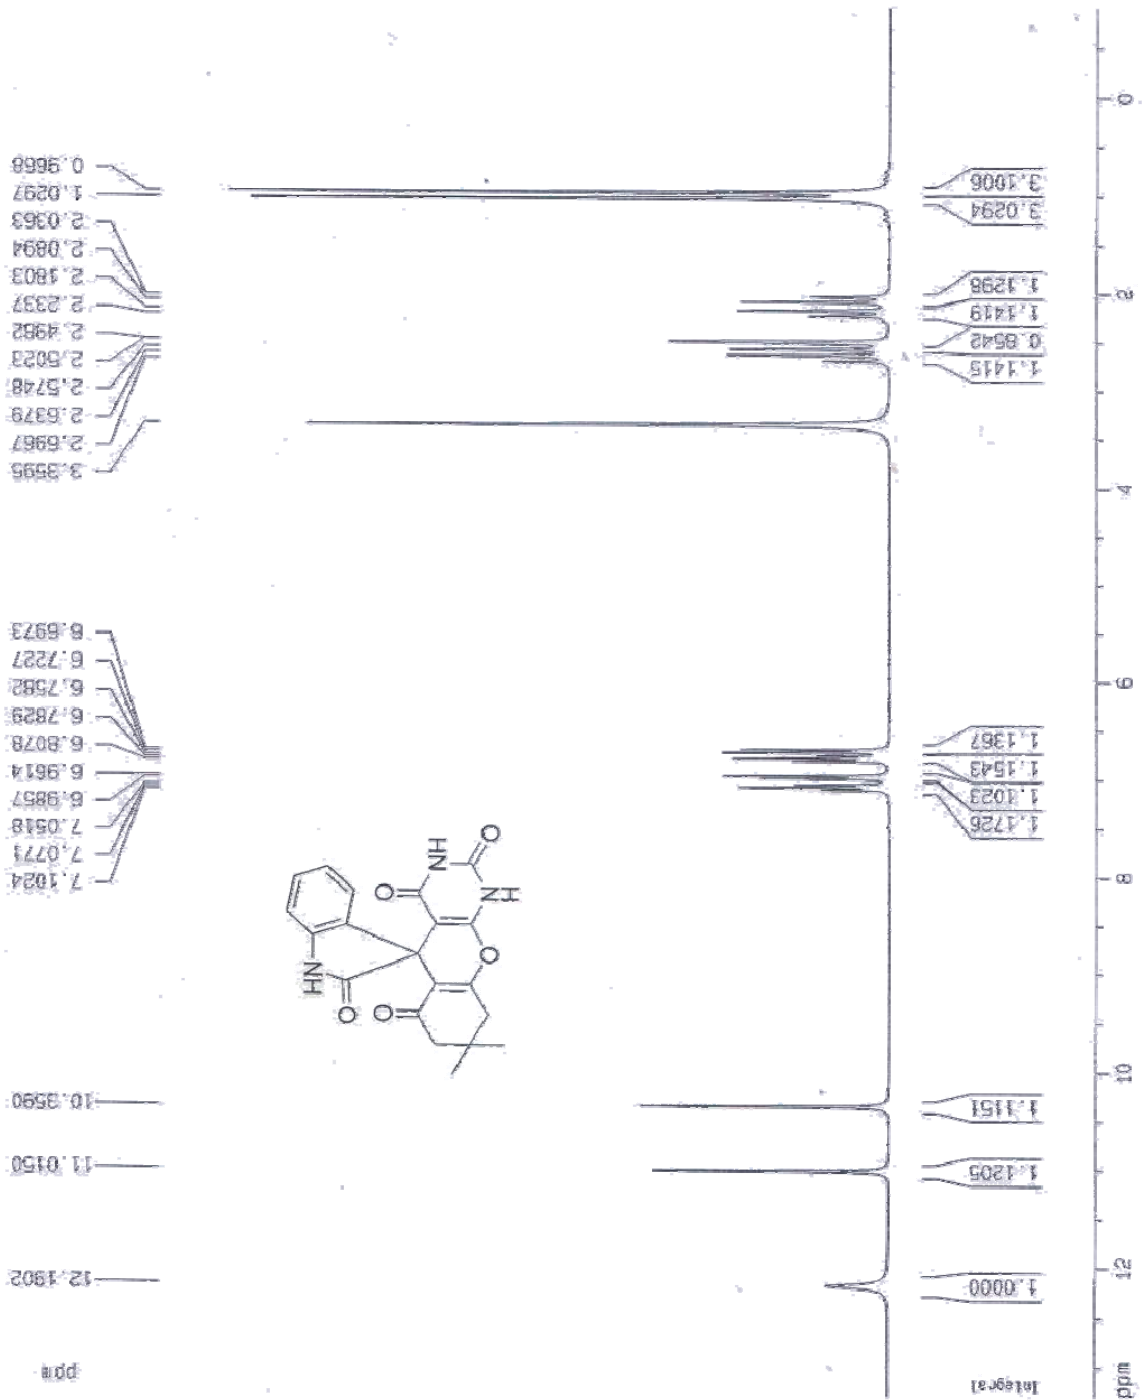

<sup>1</sup>H NMR of 8c

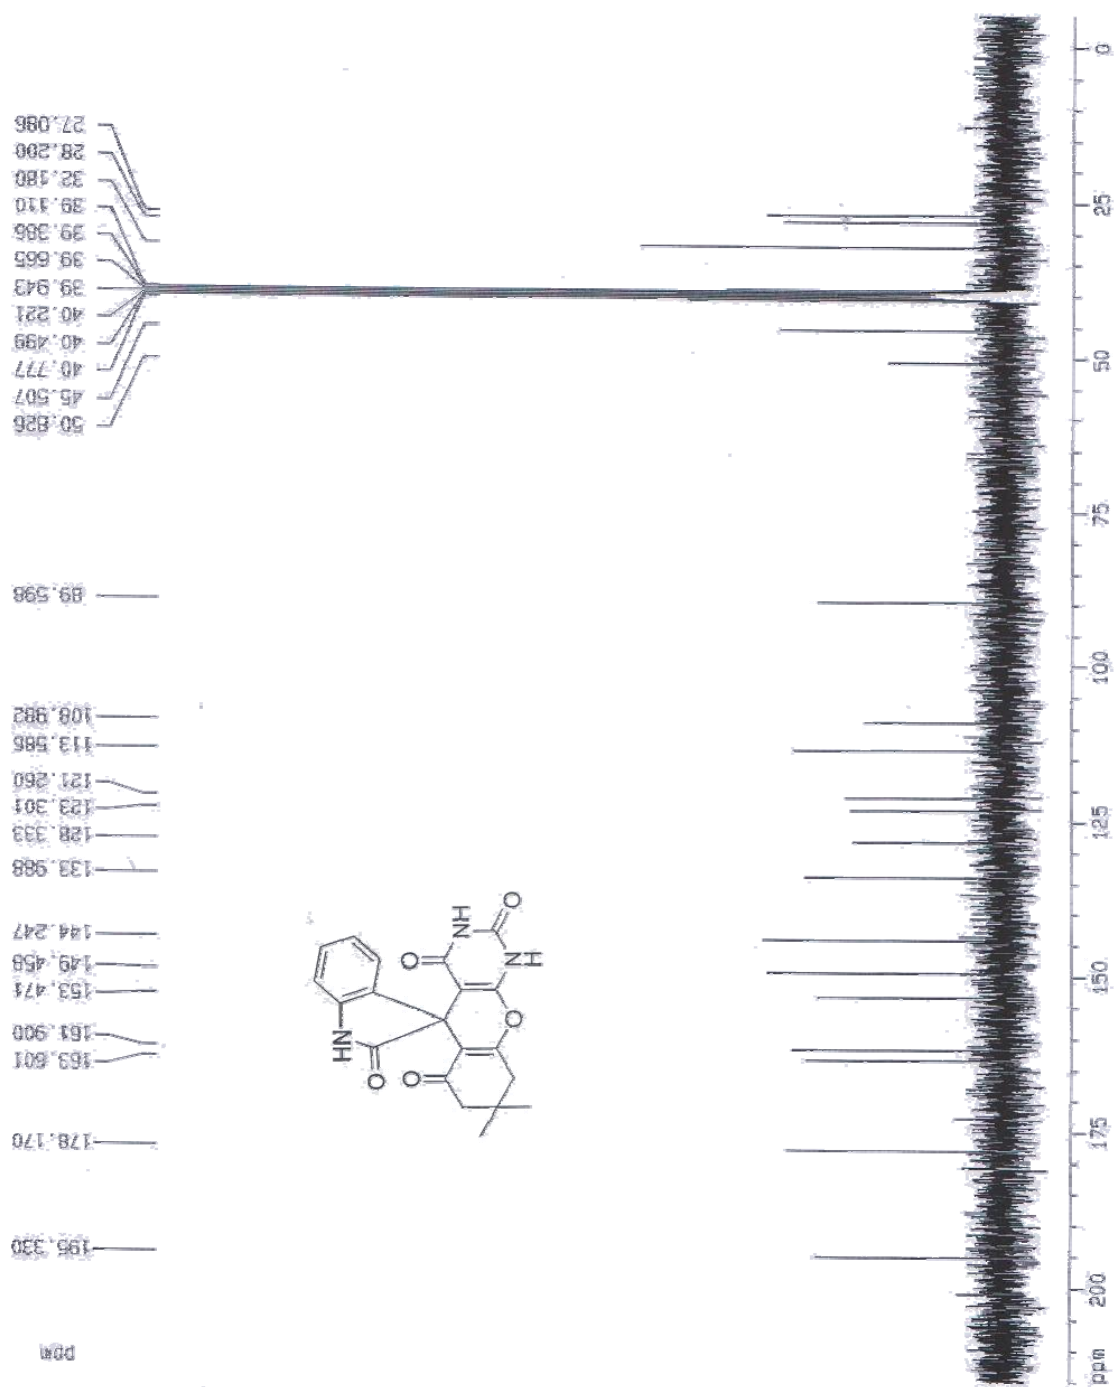

<sup>13</sup>C NMR of 8c

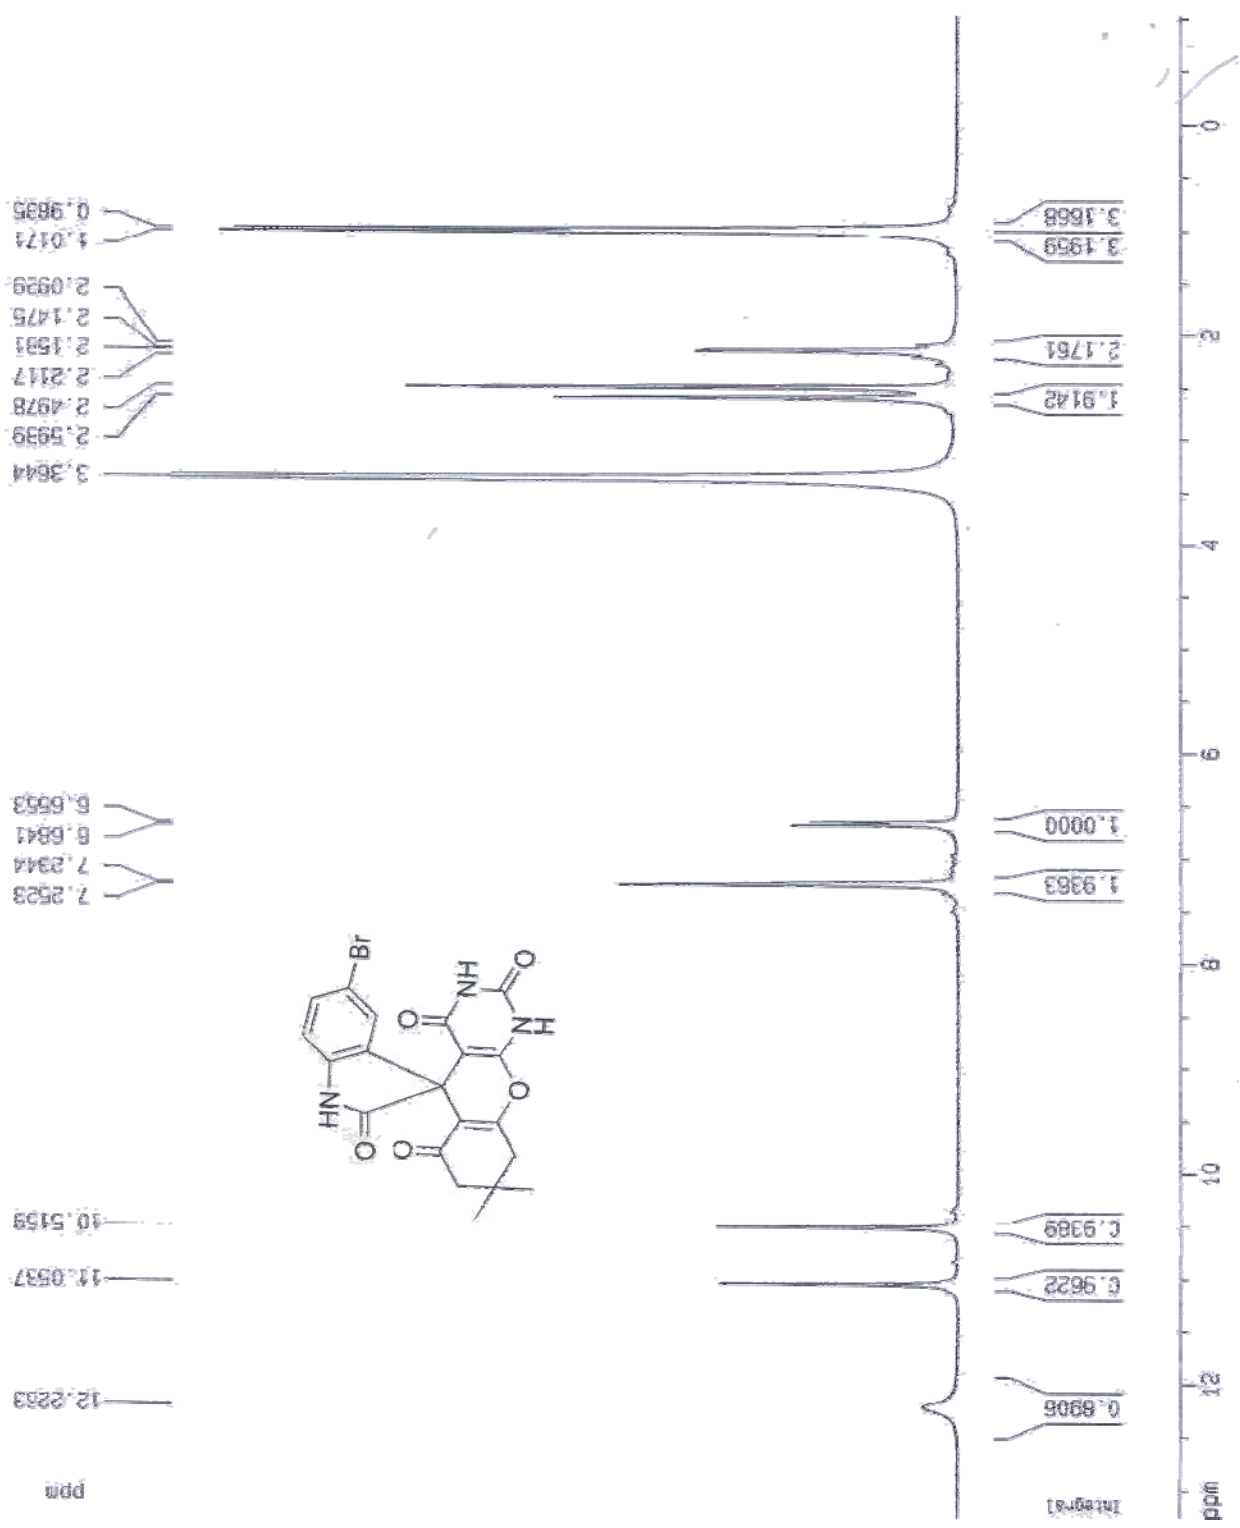

<sup>1</sup>H NMR of 8d

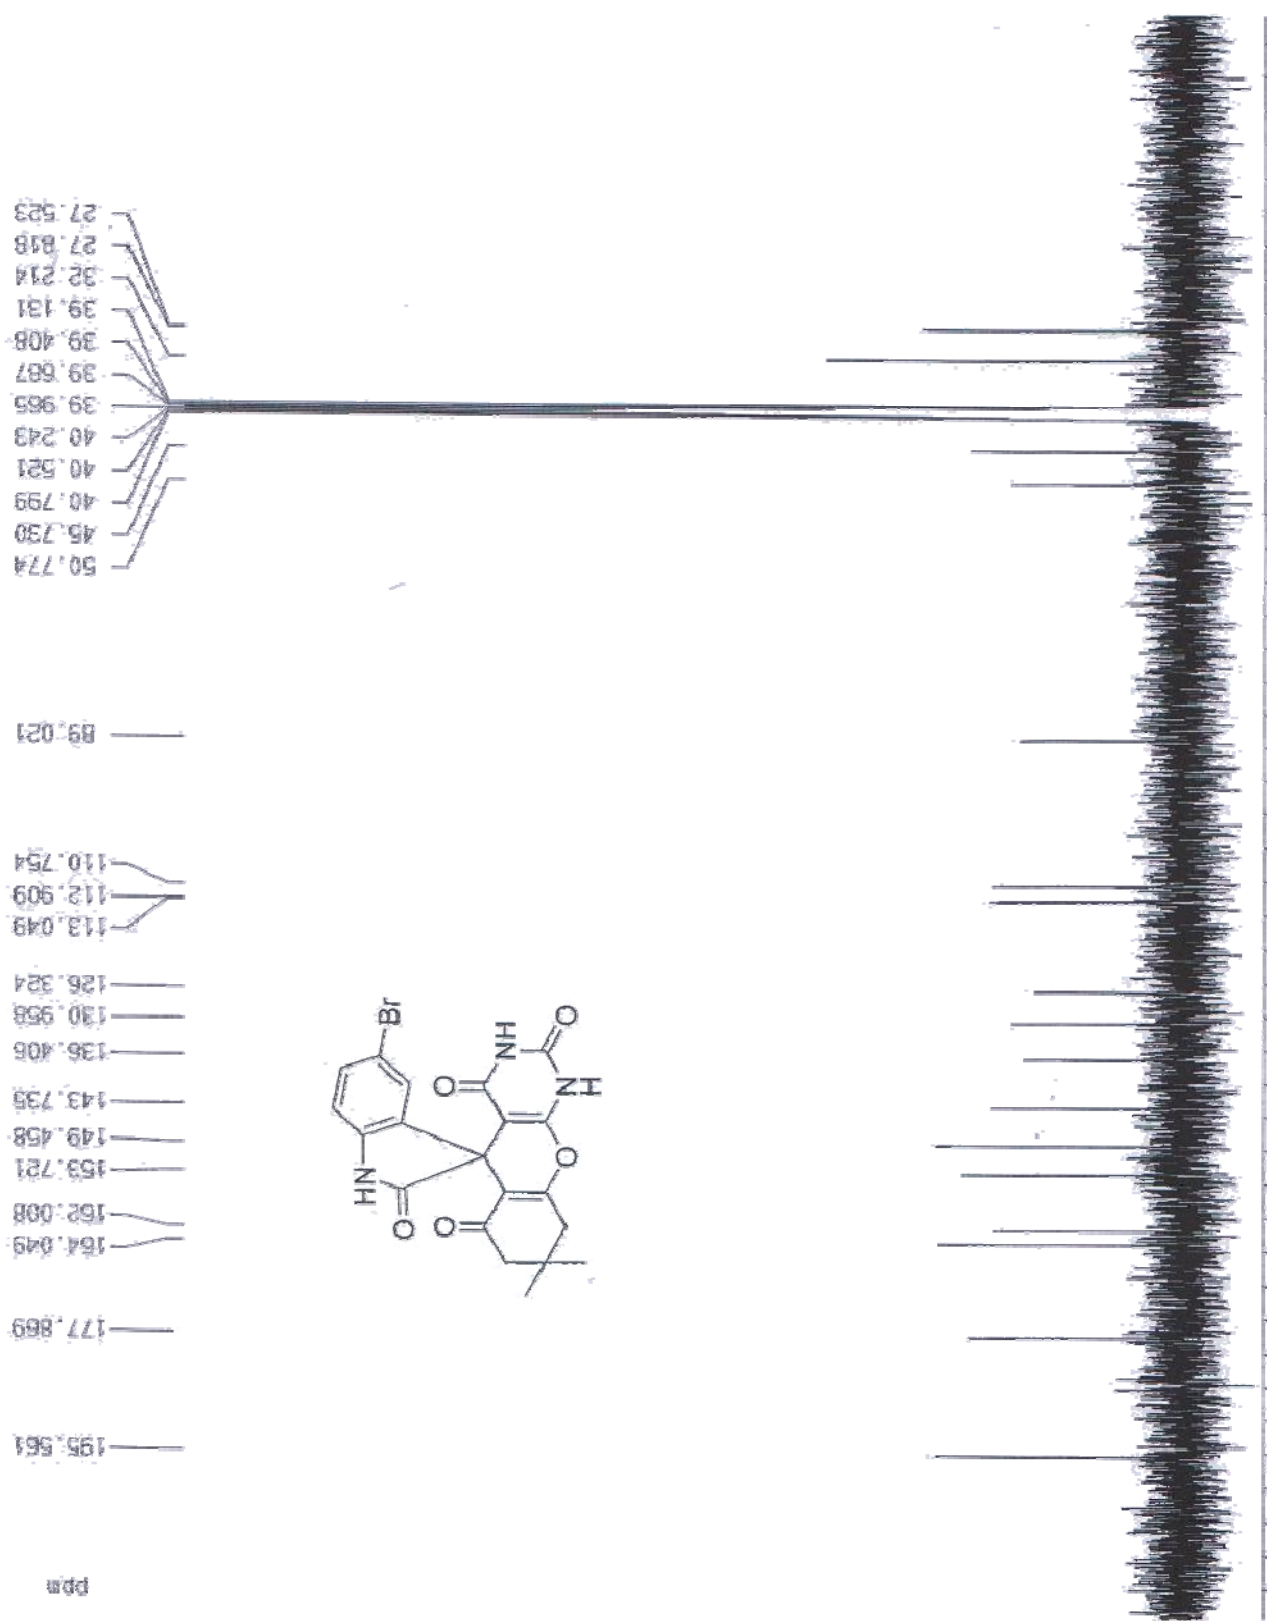

$^{13}\text{C}$  NMR of **8d**

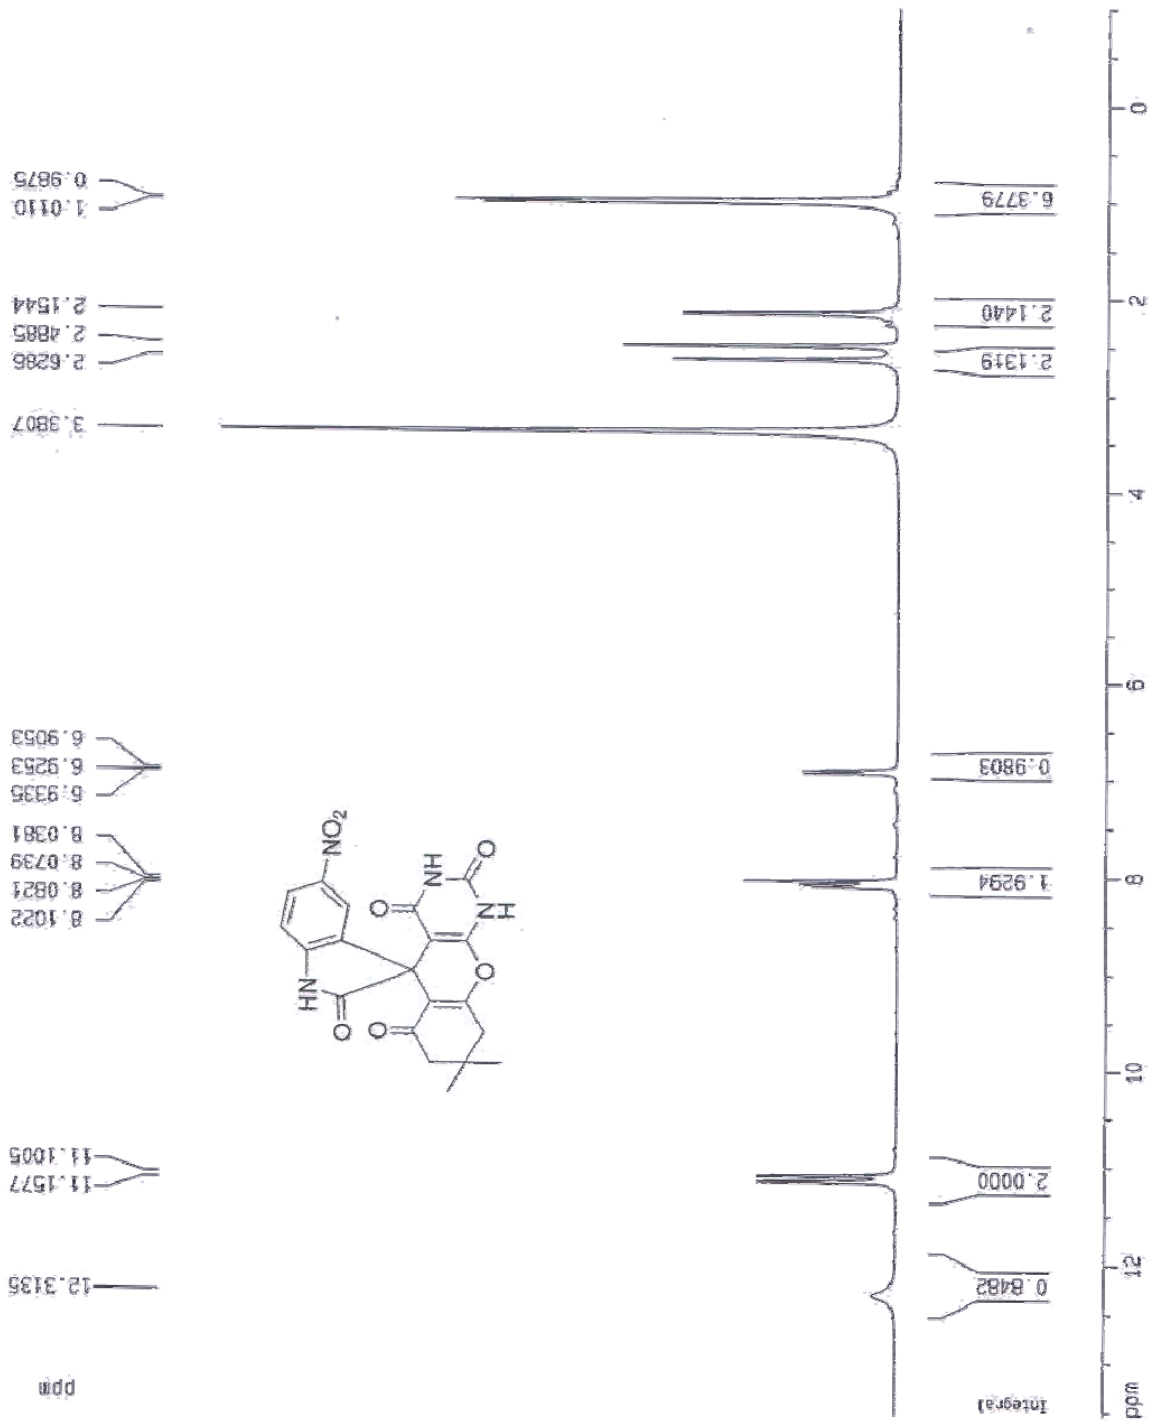

<sup>1</sup>H NMR of **8e**

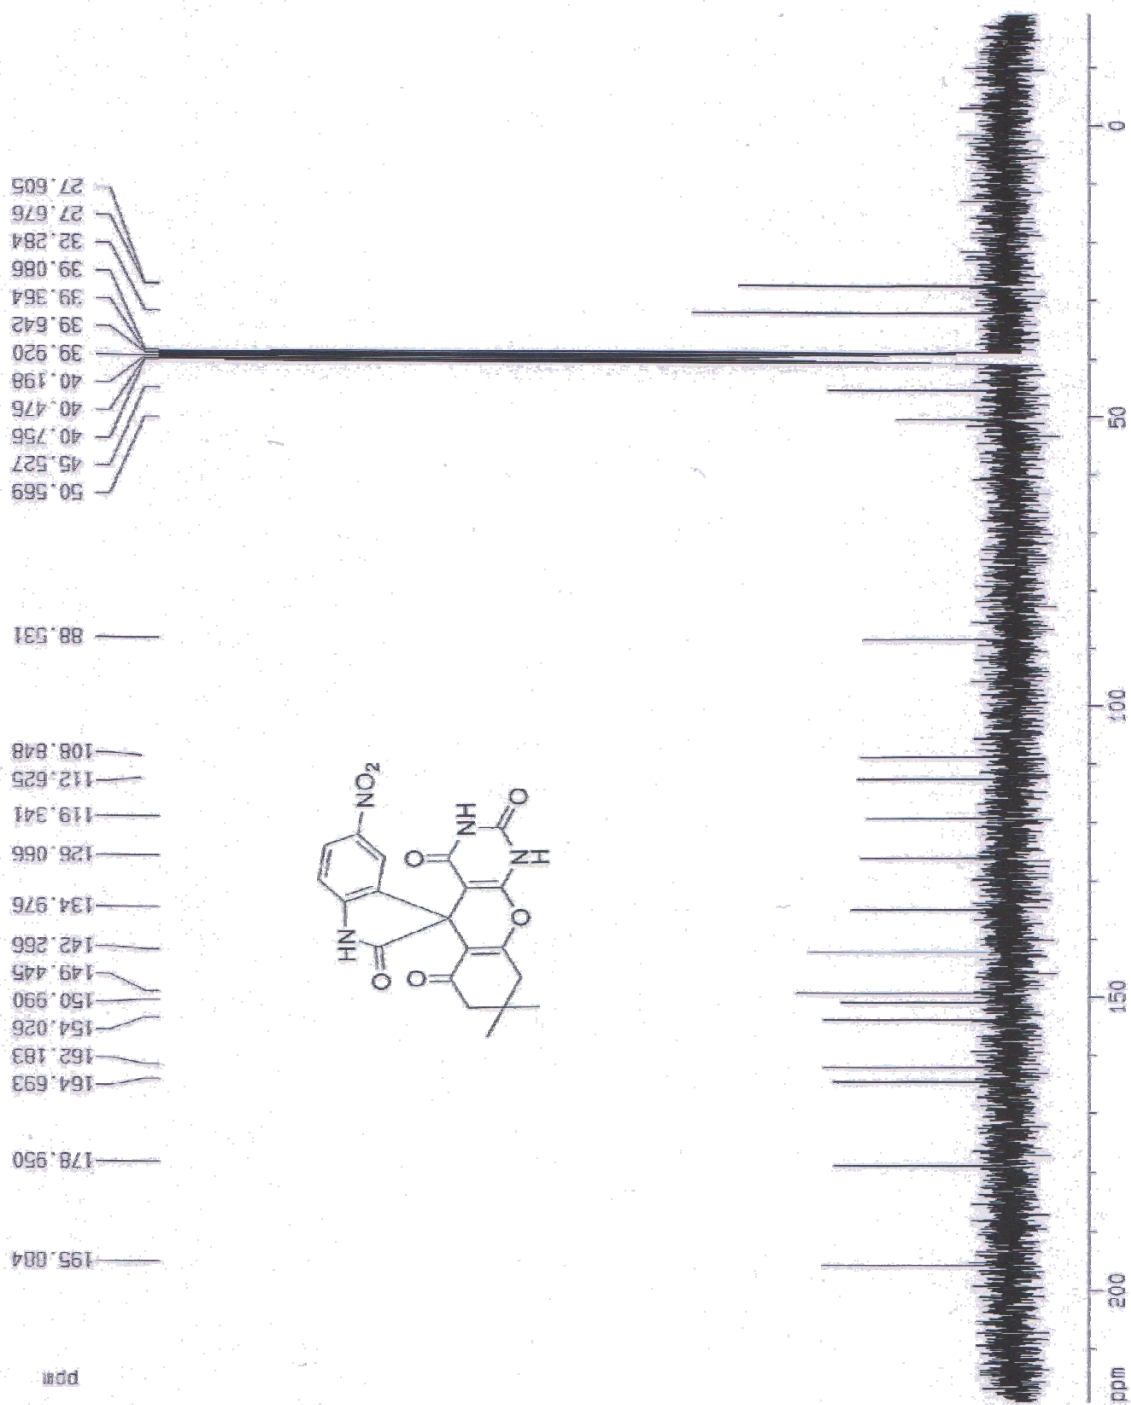

<sup>13</sup>C NMR of **8e**



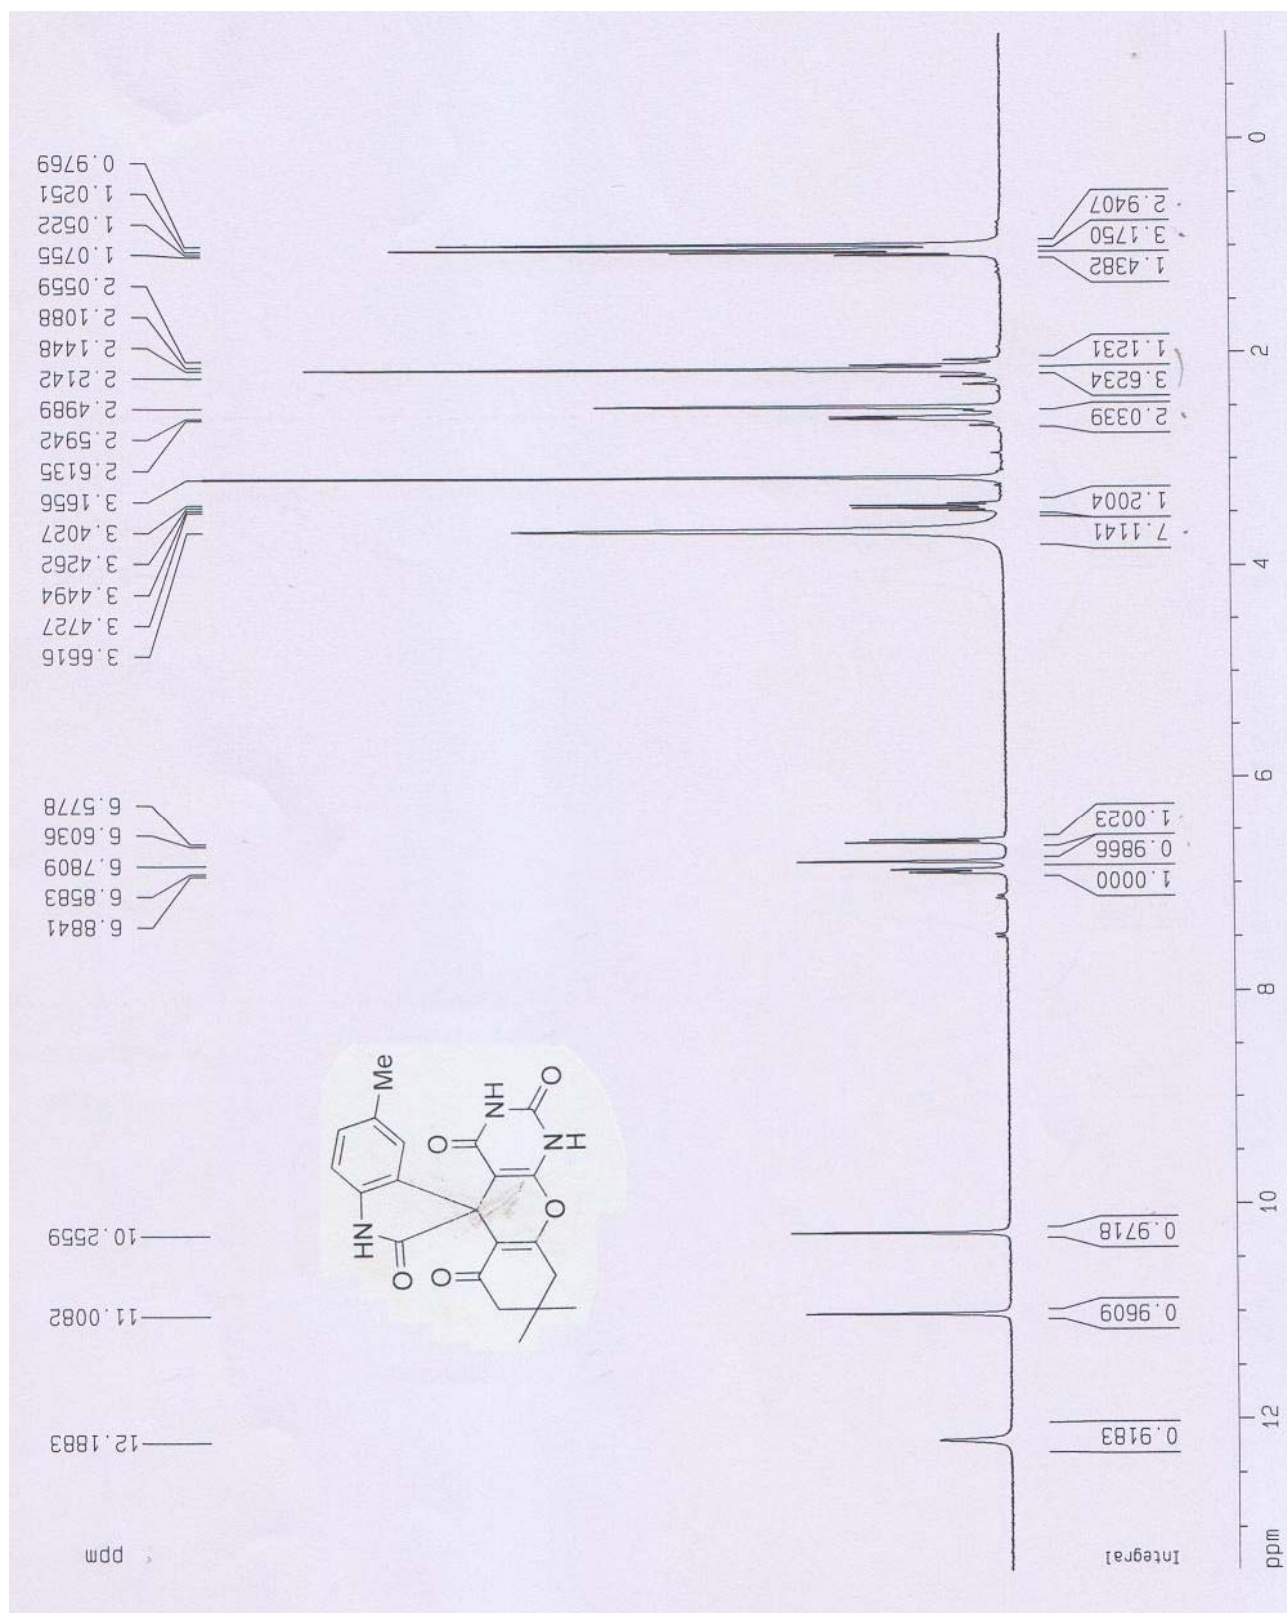

<sup>1</sup>H NMR of **8f**



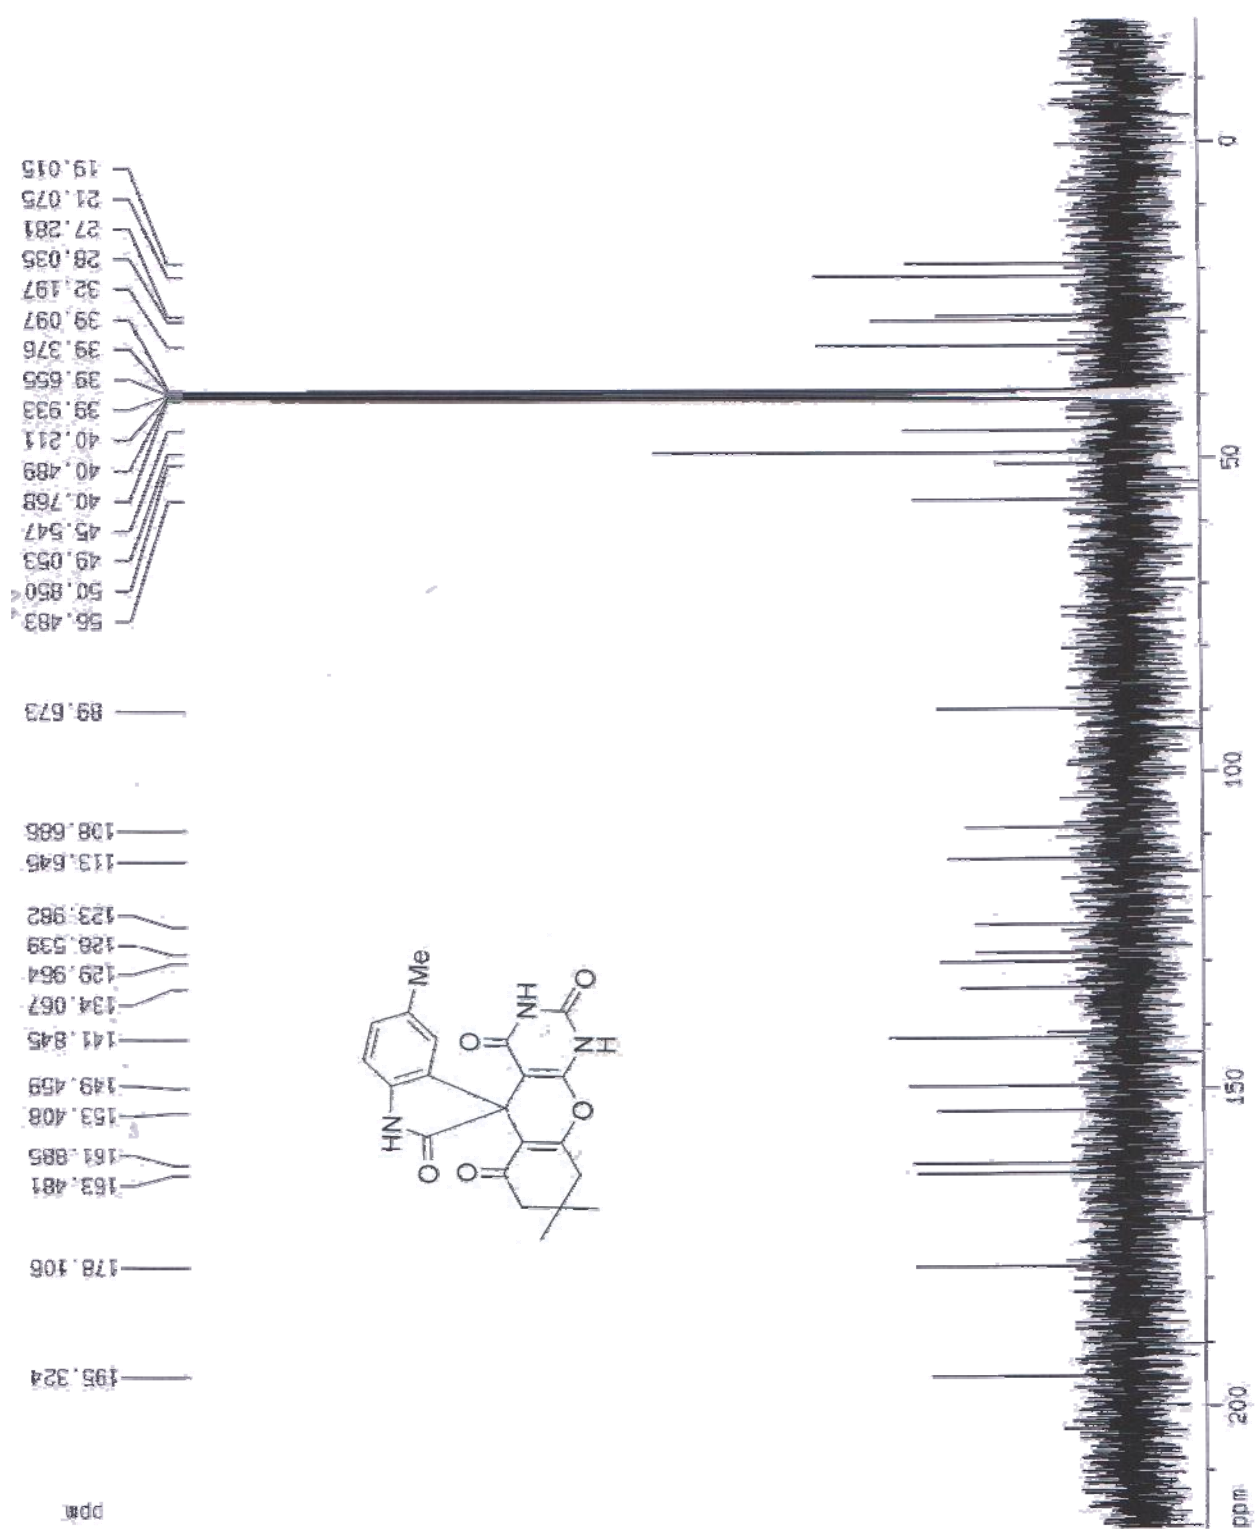

<sup>13</sup>C NMR of 8f

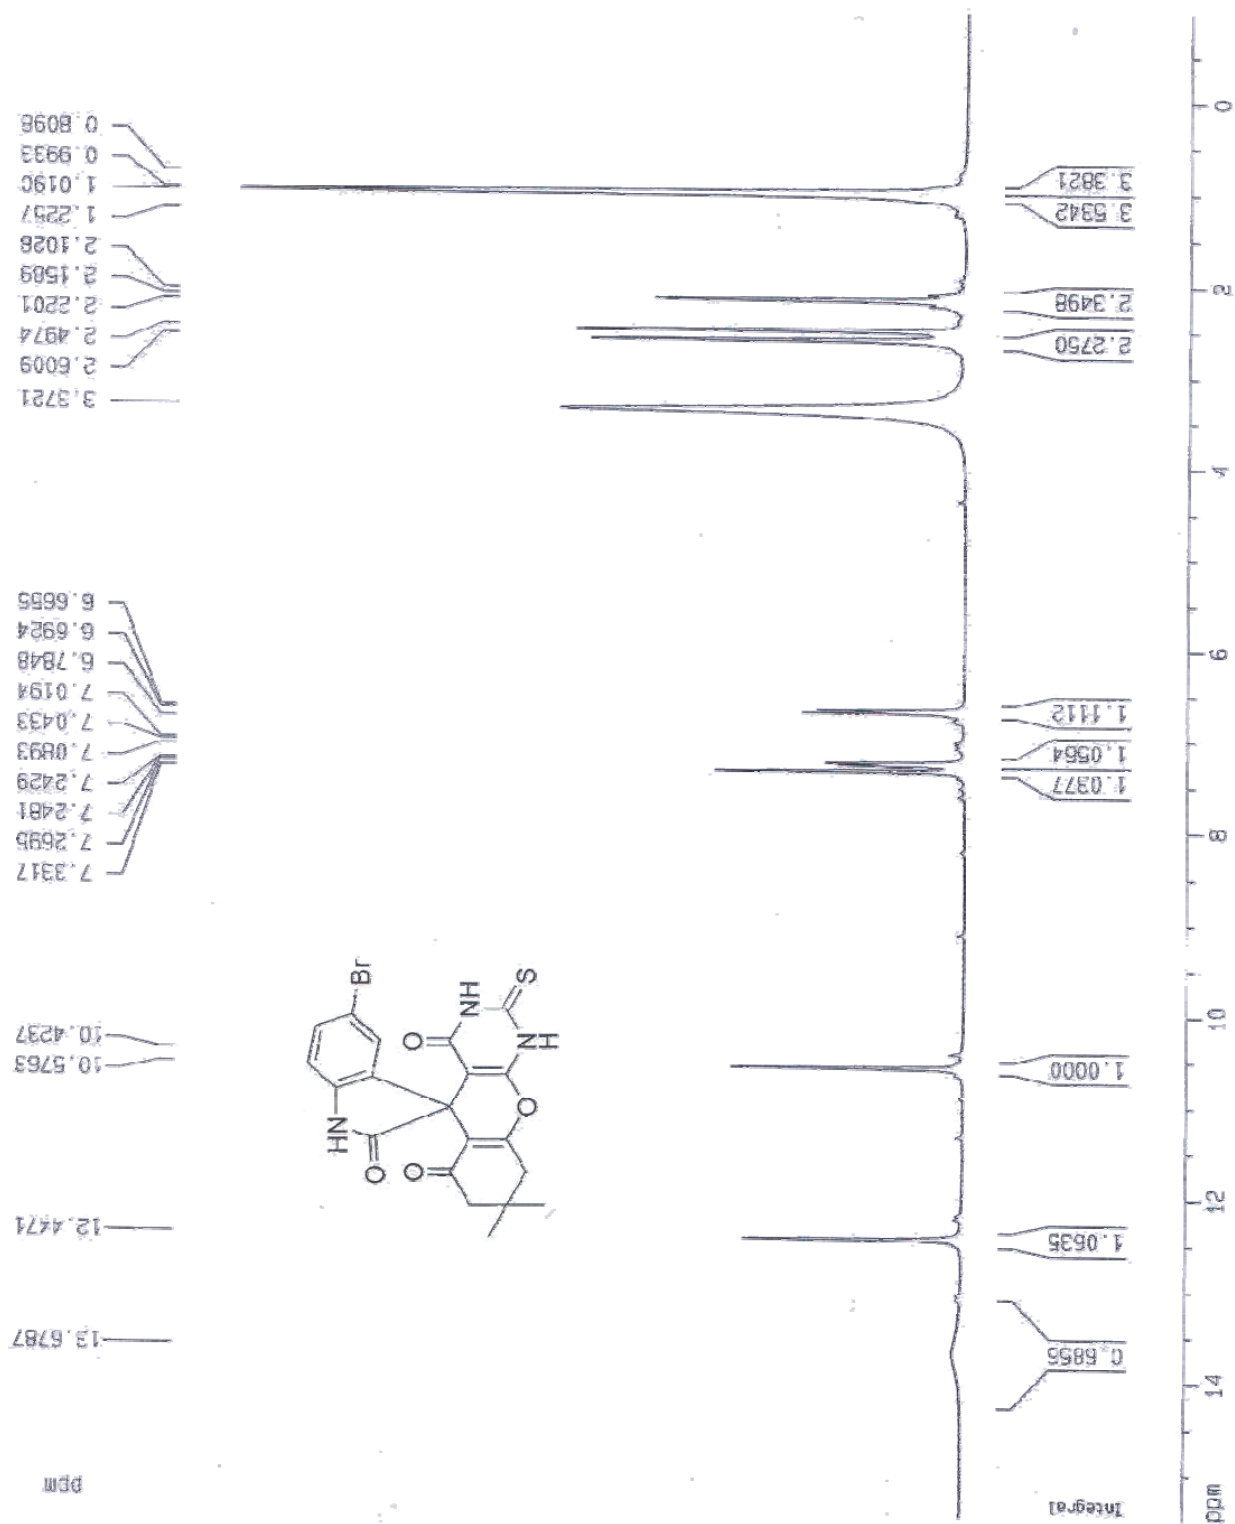

<sup>1</sup>H NMR of **8g**

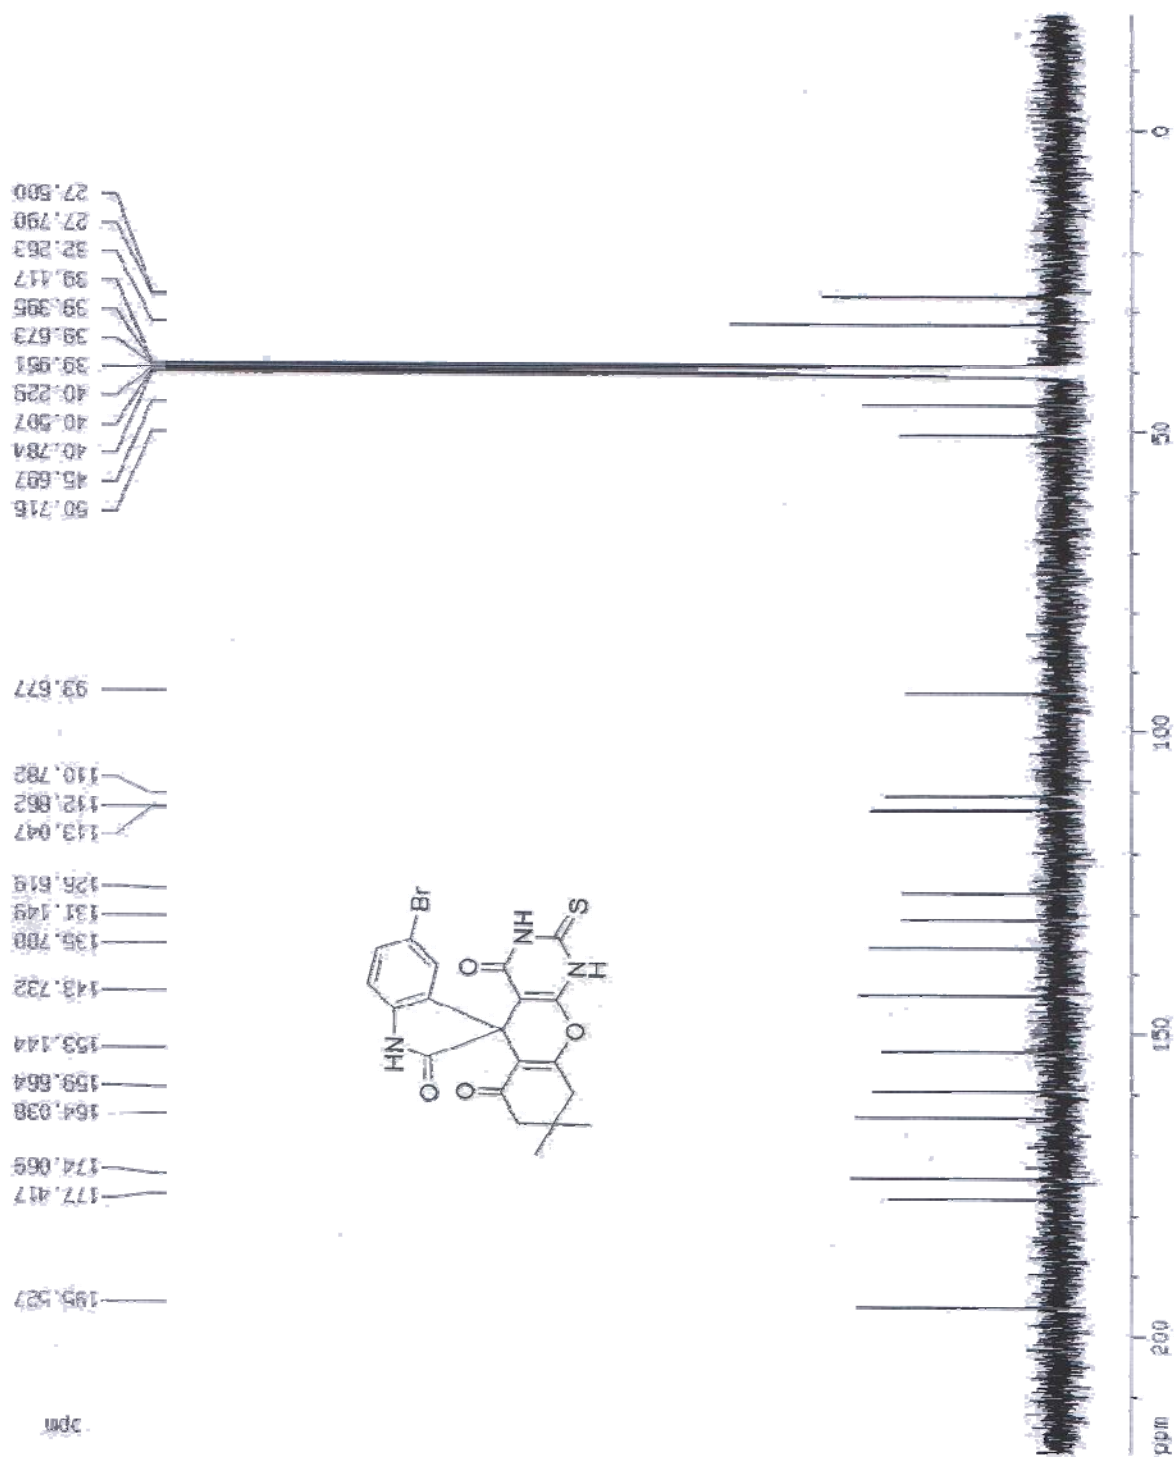

$^{13}\text{C}$  NMR of **8g**

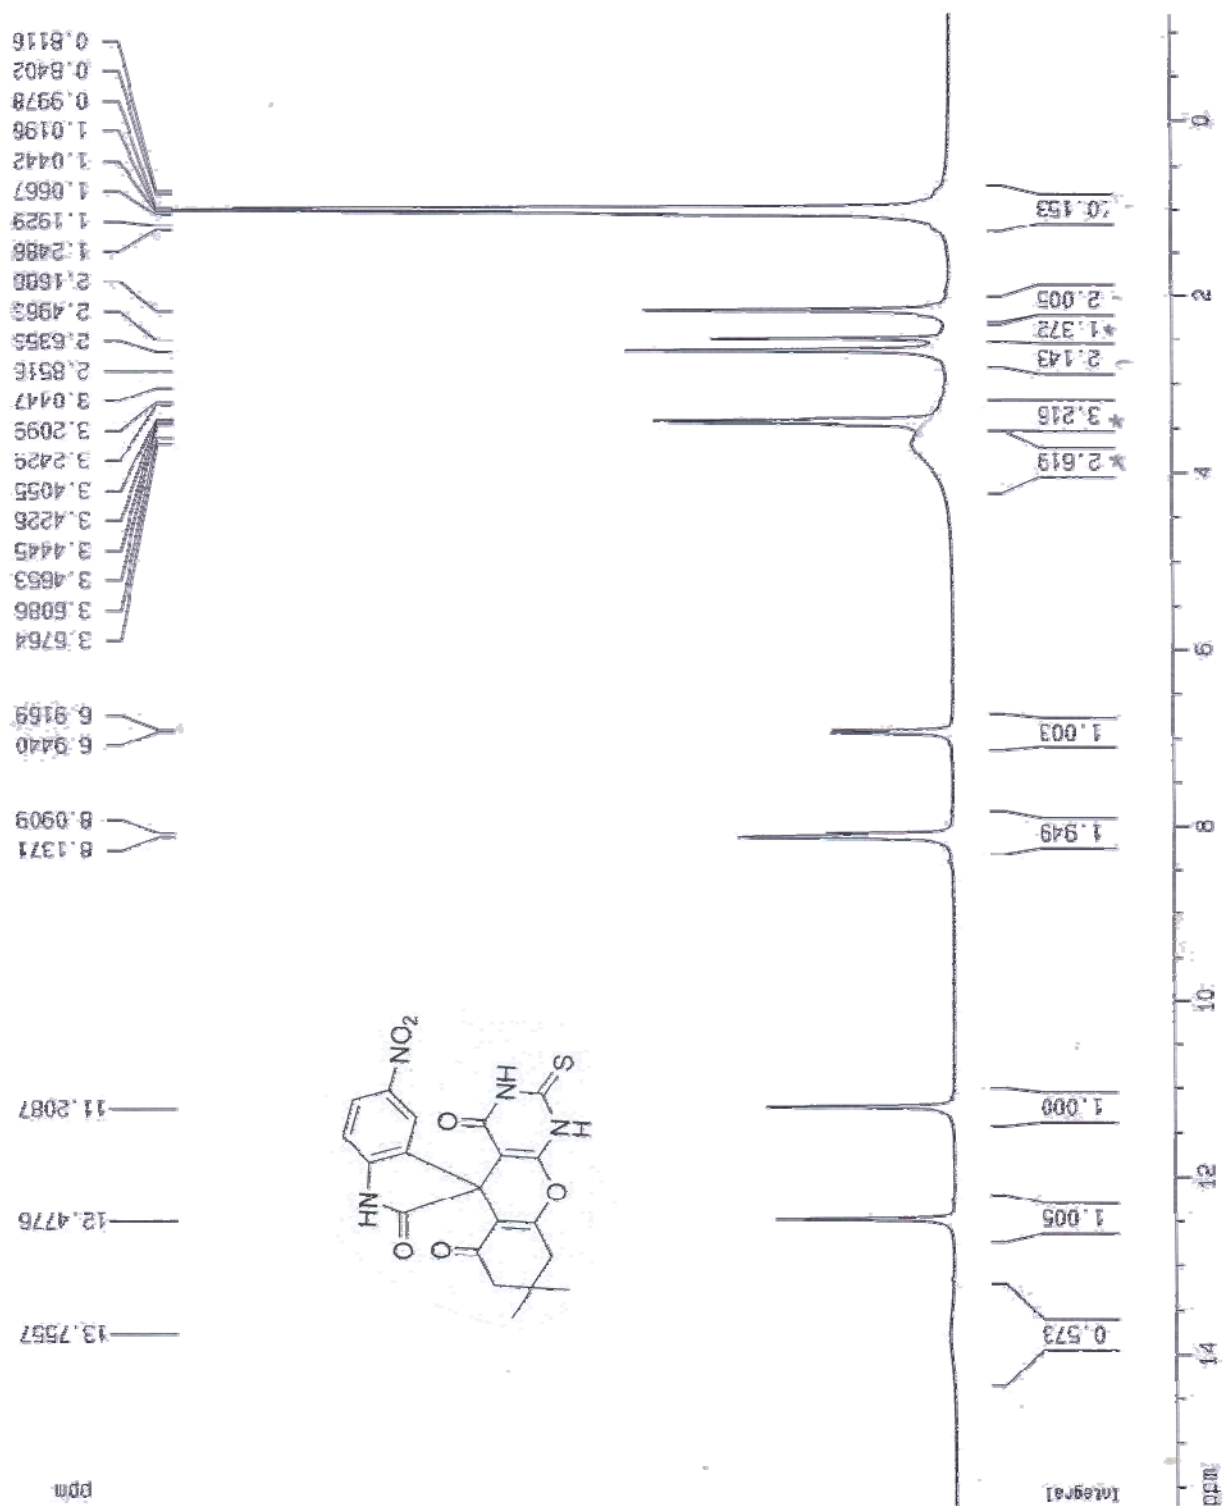

$^1\text{H}$  NMR of **8h**

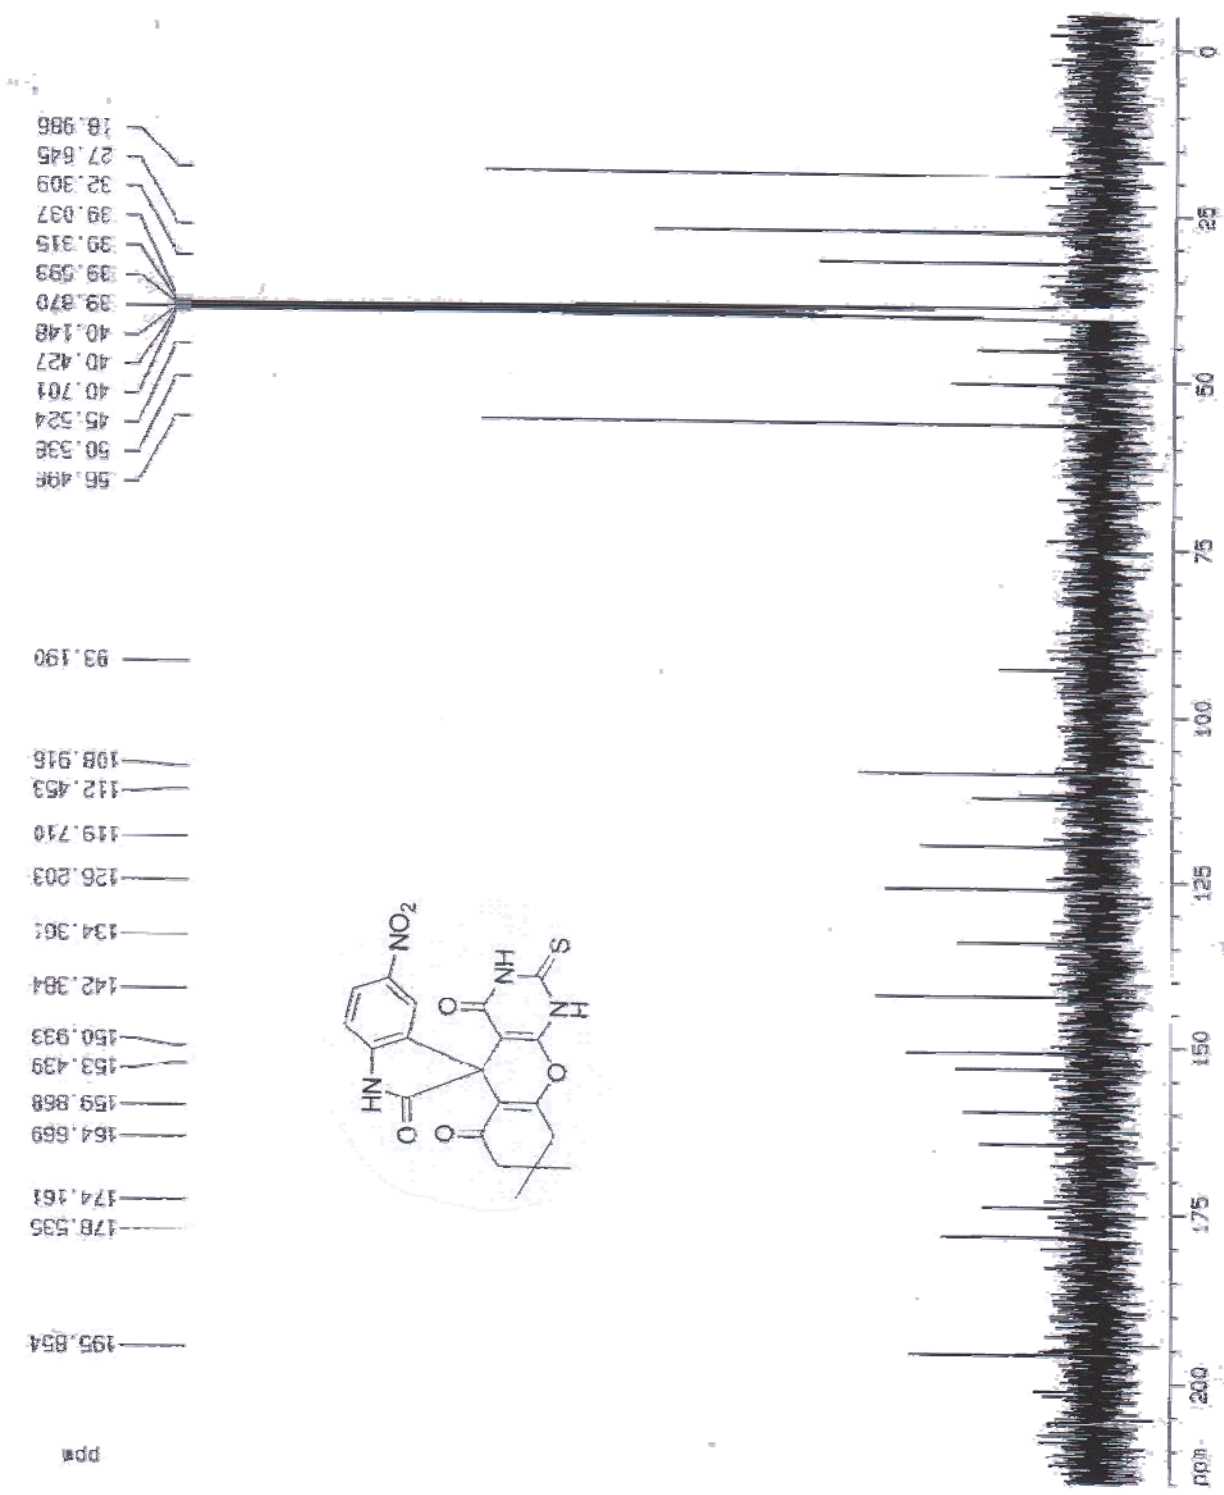

<sup>13</sup>C NMR of 8h
